# Supplementary material for: Synthesis, Characterization, Fluorescence Properties, and DFT Modeling of Difluoroboron Biindolediketonates
Source: MDPI journal article supplement (doi:10.3390/molecules28124688), 2023-06-10
Supplement: s1 [file s1]

# Supplementary Materials

## Synthesis, Characterization, Fluorescence Properties, and DFT Modeling of Difluoroboron Biindolediketones

Angelo Maspero <sup>1</sup>, Federico Vavassori <sup>1</sup>, Luca Nardo <sup>1</sup>, Guglielmo Vesco <sup>1</sup>, Jenny G. Vitillo <sup>1\*</sup>, Andrea Penoni <sup>1\*</sup>

<sup>1</sup>Department of Science and High Technology and INSTM, University of Insubria, Via Valleggio 9, 22100 Como, Italy.

\*Correspondence: (J.G.V.) jg.vitillo@gmail.com, (A.P.) andrea.penoni@uninsubria.it

### Summary

|                                                                                                          |    |
|----------------------------------------------------------------------------------------------------------|----|
| <b>S1. Synthesis of starting materials</b> .....                                                         | 4  |
| <b>S1.1. 5-Chloro-N-methyl-1H-indole (2b)</b> .....                                                      | 4  |
| <b>S1.2. 5-Methoxy-N-methyl-1H-indole (2c)</b> .....                                                     | 4  |
| <b>S1.3. 1,3-Bis(1-methyl-1H-indol-3-yl)propane-1,3-dione HBIP (3a)</b> .....                            | 4  |
| <b>S1.4 1,3-Bis(5-chloro-1-methyl-1H-indol-3-yl)propane-1,3-dione HBCIP (3b)</b> .....                   | 4  |
| <b>S1.5 1,3-Bis(5-methoxy-1-methyl-1H-indol-3-yl)propane-1,3-dione HBMIP (3c)</b> .....                  | 5  |
| <b>S2. NMR spectroscopy data on 4a</b> .....                                                             | 6  |
| <b>S2.1. <sup>1</sup>H-NMR spectrum of BF2BIP (4a)</b> .....                                             | 6  |
| <b>S2.2. <sup>13</sup>C-NMR spectrum of BF2BIP (4a)</b> .....                                            | 7  |
| <b>S2.3. <sup>19</sup>F-NMR spectrum of BF2BIP (4a)</b> .....                                            | 8  |
| <b>S2.4. <sup>11</sup>B-NMR spectrum of BF2BIP (4a)</b> .....                                            | 9  |
| <b>S3. NMR spectroscopy data on 4b</b> .....                                                             | 10 |
| <b>S3.1. <sup>1</sup>H-NMR spectrum of BF2CIBIP (4b)</b> .....                                           | 10 |
| <b>S3.2. <sup>13</sup>C-NMR spectrum of BF2CIBIP (4b)</b> .....                                          | 11 |
| <b>S3.3. <sup>19</sup>F-NMR spectrum of BF2CIBIP (4b)</b> .....                                          | 12 |
| <b>S3.4. <sup>11</sup>B-NMR spectrum of BF2CIBIP (4b)</b> .....                                          | 13 |
| <b>S4. NMR spectroscopy data on 4c</b> .....                                                             | 14 |
| <b>S4.1. <sup>1</sup>H-NMR spectrum of BF2BMIP (4c)</b> .....                                            | 14 |
| <b>S4.2. <sup>13</sup>C-NMR spectrum of BF2BMIP (4c)</b> .....                                           | 15 |
| <b>S4.3. <sup>19</sup>F-NMR spectrum of BF2BMIP (4c)</b> .....                                           | 16 |
| <b>S4.4. <sup>11</sup>B-NMR spectrum of BF2BMIP (4c)</b> .....                                           | 17 |
| <b>S5. IR spectra</b> .....                                                                              | 18 |
| <b>S6. Supplementary experimental UV-Vis absorption spectroscopy data</b> .....                          | 20 |
| <b>S7. Supplementary theoretical UV-Vis absorption spectra and data</b> .....                            | 21 |
| <b>S7.1. TD-B3LYP-D3: Excitation energies and oscillator strengths of the first excited states</b> ..... | 23 |

|                                                                                                                            |           |
|----------------------------------------------------------------------------------------------------------------------------|-----------|
| 3a keto-enol .....                                                                                                         | 23        |
| 3a cis-diketo .....                                                                                                        | 23        |
| 3a trans-diketo .....                                                                                                      | 23        |
| 4a .....                                                                                                                   | 24        |
| 4b .....                                                                                                                   | 24        |
| 4c .....                                                                                                                   | 24        |
| <b>S7.2. TDA-B3LYP-D3: Excitation energies and oscillator strengths of the first excited states .....</b>                  | <b>24</b> |
| 3a keto-enol .....                                                                                                         | 24        |
| 3a cis-diketo .....                                                                                                        | 25        |
| 3a trans-diketo .....                                                                                                      | 25        |
| 4a .....                                                                                                                   | 25        |
| 4b .....                                                                                                                   | 26        |
| 4c .....                                                                                                                   | 26        |
| <b>S7.3. TDA-<math>\omega</math>B97X-D: Excitation energies and oscillator strengths of the first excited states .....</b> | <b>26</b> |
| 3a keto-enol .....                                                                                                         | 26        |
| 3a cis-diketo .....                                                                                                        | 27        |
| 3a trans-diketo .....                                                                                                      | 27        |
| 4a .....                                                                                                                   | 28        |
| 4b .....                                                                                                                   | 28        |
| 4c .....                                                                                                                   | 28        |
| <b>S7.4. TDA-M06-2X: Excitation energies and oscillator strengths of the first excited states .....</b>                    | <b>29</b> |
| 3a keto-enol .....                                                                                                         | 29        |
| 3a cis-diketo .....                                                                                                        | 29        |
| 3a trans-diketo .....                                                                                                      | 30        |
| 4a .....                                                                                                                   | 30        |
| 4b .....                                                                                                                   | 30        |
| 4c .....                                                                                                                   | 31        |
| <b>S7.5. TDA-CAM-B3LYP-D3: Excitation energies and oscillator strengths of the first excited states .....</b>              | <b>31</b> |
| 3a keto-enol .....                                                                                                         | 31        |
| 3a cis-diketo .....                                                                                                        | 31        |
| 3a trans-diketo .....                                                                                                      | 32        |
| 4a .....                                                                                                                   | 32        |
| 4b .....                                                                                                                   | 33        |
| 4c .....                                                                                                                   | 33        |
| <b>S8. Supplementary electronic-state transition spectroscopy data .....</b>                                               | <b>38</b> |
| <b>S9. Supplementary theoretical emission data .....</b>                                                                   | <b>42</b> |



## S1. Synthesis of starting materials

### S1.1. 5-Chloro-N-methyl-1H-indole (2b)

Under inert atmosphere 5-chloro-1H-indole (3 g, 20 mmol, 1 equiv.) is dissolved in dry THF (80 mL) and sodium hydride (1.2 g, 60% suspension in mineral oil, 1.5 equiv.) is slowly added at 0 °C. After being stirred at 0 °C for 1.5 h methyl iodide (1.62 mL, 26 mmol, 1.3 equiv.) is added. The mixture is then warmed to rt and stirred overnight. After cooling again to 0 °C, the reaction is quenched with water (40 mL) and extracted with diethyl ether (3x50 mL); the combined organic layers are dried over Na<sub>2</sub>SO<sub>4</sub>, filtered and the solvent removed under reduced pressure. The resulting crude product is purified via column chromatography (n-Hexane/EtOAc 9:1, R<sub>f</sub> = 0.56) to give 5-chloro-N-methyl-1H-indole (2.84 g, 85% yield). <sup>1</sup>H-NMR (CDCl<sub>3</sub>) δ = 7.58 (d, *J* = 1.6 Hz, 1H, ArH), 7.26 - 7.15 (m, 2H, ArH), 7.06 (d, *J* = 3.2 Hz, 1H, ArH), 6.42 (d, *J* = 3.2 Hz, 1H, ArH), 3.27 (s, 3H, NCH<sub>3</sub>).

### S1.2. 5-Methoxy-N-methyl-1H-indole (2c)

Under inert atmosphere, 5-Methoxy-1H-indole (2 g, 13.6 mmol, 1 eq.) is dissolved in dry THF (60 mL) and sodium hydride (0.81 g, 60% suspension in mineral oil, 1.5 eq.) is slowly added 0 °C. After being stirred at 0 °C for 1.5 min, methyl iodide (1.1 mL, 17.7 mmol, 1.3 eq.) is added. The mixture is warmed to rt and stirred overnight. After cooling again to 0 °C, the reaction is quenched with water (40 mL) and extracted with diethyl ether (3x50 mL); the combined organic layers are dried over Na<sub>2</sub>SO<sub>4</sub>, filtered and the solvent removed under reduced pressure. The resulting crude product is purified via column chromatography (n-Hexane/EtOAc 9:1) to give 5-methoxy-N-methyl-1H-indole (2.09 g, 94% yield). <sup>1</sup>H-NMR (CDCl<sub>3</sub>) δ = 7.30 (d, 1H, *J* = 8.5 Hz, ArH), 7.13 (s, 1H, ArH), 7.05 (s, 1 H, ArH), 6.92 (d, 1H, *J* = 8.8 Hz, ArH), 6.43 (d, 1H, *J* = 1.0 Hz, ArH), 3.90 (s, 3H, NCH<sub>3</sub>), 3.80 (s, 3H, OCH<sub>3</sub>).

### S1.3. 1,3-Bis(1-methyl-1H-indol-3-yl)propane-1,3-dione HBIP (3a)

Under inert atmosphere, a solution of malonyl dichloride (1 mL, 10 mmol) in dichloromethane (10 mL) is added dropwise to a stirred solution of 1-methyl-1H-indole (2.55 mL, 20 mmol) in dichloromethane (15 mL) at 0 °C. The reaction is stirred for 2h at rt. The mixture is then added to 5% aqueous sodium carbonate, vigorously stirred for 2 min and extracted with dichloromethane, dried over sodium sulfate and evaporated. The residue is purified via column chromatography (DCM/EtOAc 95:5) to obtain HBIP as a yellow powder (1.42 g, 42% yield). <sup>1</sup>H-NMR (d<sub>6</sub>-DMSO) δ = 17.4 (keto-enol, br s, 1H, enol OH) 8.44 (diketo, s, 2H), 8.40 (keto-enol, s, 2H), 8.23 (keto-enol, d, <sup>3</sup>*J* = 7.6 Hz, 2H), 8.16 (diketo, d, <sup>3</sup>*J* = 7.6 Hz, 2H), 7.56 (diketo/keto-enol, m, 4H), 7.29 (diketo/keto-enol, m, 4H), 7.23 (diketo/keto-enol, m, 4H), 6.77 (keto-enol, s, 1H, enol CH), 4.39 (diketo, s, 2H, diketo CH<sub>2</sub>), 3.91 (keto-enol, s, 6H, N-CH<sub>3</sub>) 3.89 (diketo, s, 6H, N-CH<sub>3</sub>). IR (ATR)  $\tilde{\nu}$  (cm<sup>-1</sup>) = 3105 (w), 1618 (vs), 1575 (w), 1524 (vs), 1487 (vw), 1461 (s), 1421 (vw), 1391 (vw), 1365 (vs), 1334 (w), 1218 (s), 1126 (m), 1089 (s), 1081 (s), 1056 (w), 919 (s), 855 (w), 762 (w), 746 (s), 683 (w).

### S1.4 1,3-Bis(5-chloro-1-methyl-1H-indol-3-yl)propane-1,3-dione HBCIIP (3b)

Under inert atmosphere a solution of malonyl dichloride (973  $\mu$ L, 10 mmol, 1 eq.) in dichloromethane (10 mL) is added dropwise to a stirred solution of 5-chloro-1-methyl-1H-indole (3.31 g, 20 mmol, 2 eq.) in dichloromethane (20 mL) at 0 °C. The reaction is stirred for 2h at rt and then added to a 5% aqueous sodium carbonate solution, vigorously stirred for 2 min and extracted with dichloromethane, dried over Na<sub>2</sub>SO<sub>4</sub> and evaporated. The residue is purified via column chromatography (DCM/n-Hexane 9:1) to obtain HBCIIP as a yellow powder (0.911 g, 23% yield). <sup>1</sup>H-NMR (d<sub>6</sub>-DMSO) δ = 8.5 (diketo, s, 2H, H2), 8.47 (keto-enol, s, 2H, H2) 8.19 (keto-enol, d, 2H, <sup>4</sup>*J* = 1.8 Hz, H4), 8.14 (diketo, d, 2H, <sup>4</sup>*J* = 1.5 Hz, H4), 7.63 (keto-enol, d, 2H, <sup>3</sup>*J* = 8.4 Hz) 7.61 (diketo, d, 2H, <sup>3</sup>*J* = 8.7 Hz, H7), 7.32 (diketo/keto-enol dd, <sup>3</sup>*J* = 8.8 Hz, <sup>4</sup>*J* = 1.6 Hz, H6, 4H), 6.77 (keto-enol, s, 1H, enol CH), 4.4 (diketo s, 2H, diketo CH<sub>2</sub>), 3.91 (keto-enol, s, 6H, NCH<sub>3</sub>), 3.90 (diketo, s, 6H, NCH<sub>3</sub>). IR (ATR)  $\tilde{\nu}$  (cm<sup>-1</sup>) = 3105 (vw); 2928 (vw); 2894 (vw); 1645 (m); 1631 (s); 1614 (m); 1572 (w); 1528 (vs); 1471 (sh, m); 1461 (s), 1452 (s), 1421 (w), 1405 (vw), 1385 (w), 1363 (vs), 1341 (sh, w), 1311 (vw), 1289 (vw), 1271 (w), 1235 (m), 1234 (m), 1217 (s), 1176 (w), 1159 (w), 1137 (s), 1089 (vs), 1058 (m), 1044 (m), 972 (w), 955 (w), 916 (vw), 888 (w), 883 (w), 856 (vw), 844 (w), 837, (w), 820 (m), 802 (s), 776 (m), 752 (w), 747 (w), 730 (s).

**S1.5 1,3-Bis(5-methoxy-1-methyl-1H-indol-3-yl)propane-1,3-dione HBMIP (3c)**

Under inert atmosphere a solution of malonyl dichloride (700  $\mu$ L, 7.17 mmol, 1 eq.) in dichloromethane (8 mL) is added dropwise to a stirred solution of 5-methoxy-1-methyl-1H-indole (2.31 g, 14.3 mmol, 2 eq.) in dichloromethane (15 mL) at 0°C. The reaction is then stirred for 2h at rt and then added to a 5% aqueous sodium carbonate solution, vigorously stirred for 2 min and extracted with dichloromethane, dried over Na<sub>2</sub>SO<sub>4</sub> and evaporated. The residue is purified via column chromatography (toluene/EtOAc 7:3) to obtain HBMIP (1.26 g, 45% yield) as a yellow solid. <sup>1</sup>H-NMR (d<sub>6</sub>-DMSO)  $\delta$  = 8.36 (diketo, s, 2H, H2) 7.67 (diketo d, <sup>4</sup>J = 2.1 Hz, 2H, H4), 7.45 (diketo, d, <sup>3</sup>J = 9 Hz, 2H, H7), 6.91 (diketo, dd, <sup>3</sup>J = 9 Hz, <sup>4</sup>J = 2.3 Hz, 2H, H6), 4.34 (diketo, s, 2H, diketo CH<sub>2</sub>), 3.85 (diketo, s, 6H), 3.77 (diketo, s, 6H). IR (ATR) (cm<sup>-1</sup>) = 2941 (w), 1713 (w), 1619 (vs), 1521 (s), 1477 (s), 1453 (vs), 1361 (vs), 1264 (s), 1222 (s), 1210 (s), 1181 (m), 1139 (m), 1131 (s), 1083 (s), 1021 (s), 912 (m), 873 (s), 853 (s), 835 (s), 799 (vs), 778 (m), 683 (m), 654 (vs), 640 (s).

## S2. NMR spectroscopy data on 4a

### S2.1. <sup>1</sup>H-NMR spectrum of BF<sub>2</sub>BIP (4a)

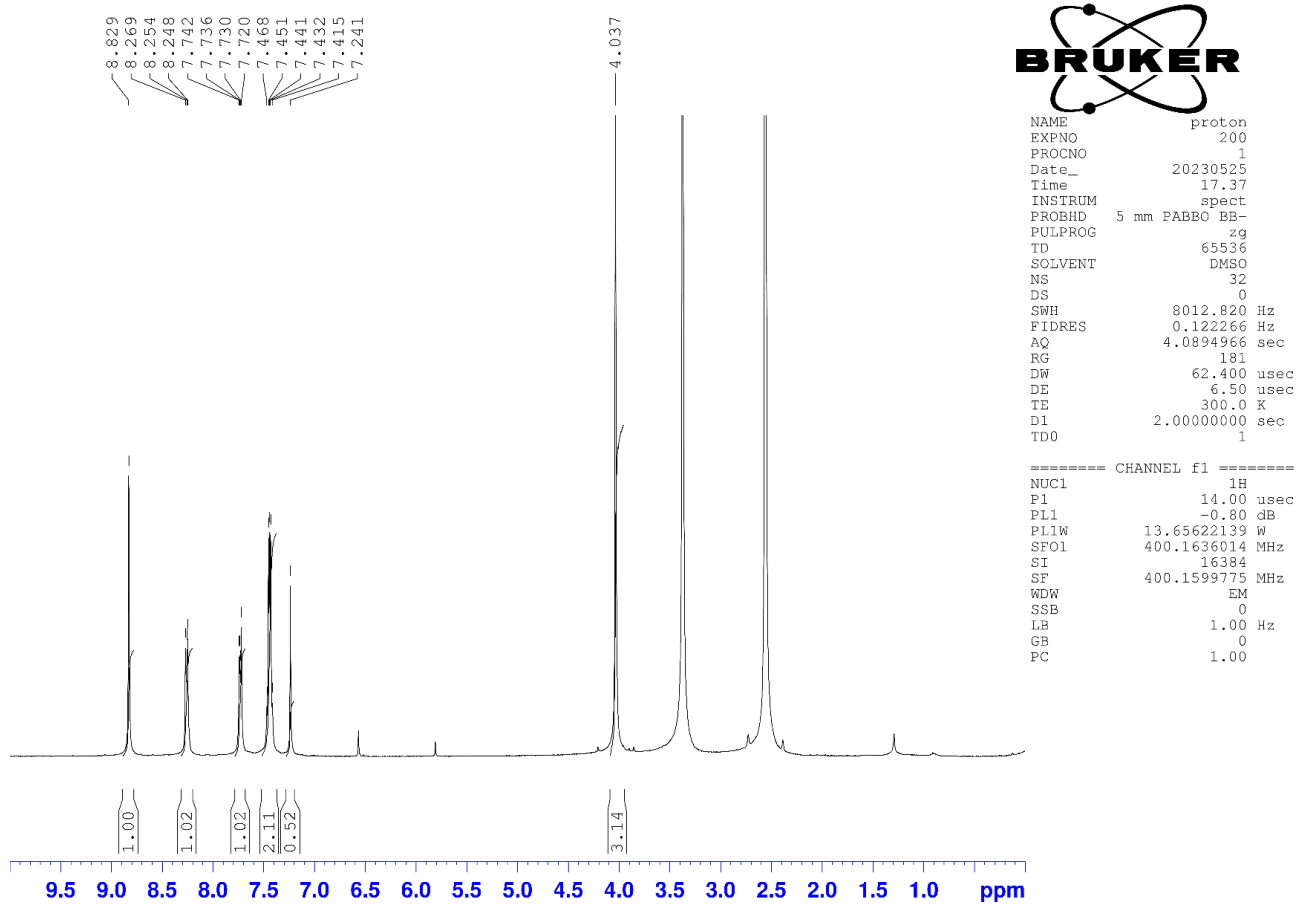

## S2.2. $^{13}\text{C}$ -NMR spectrum of BF2BIP (4a)

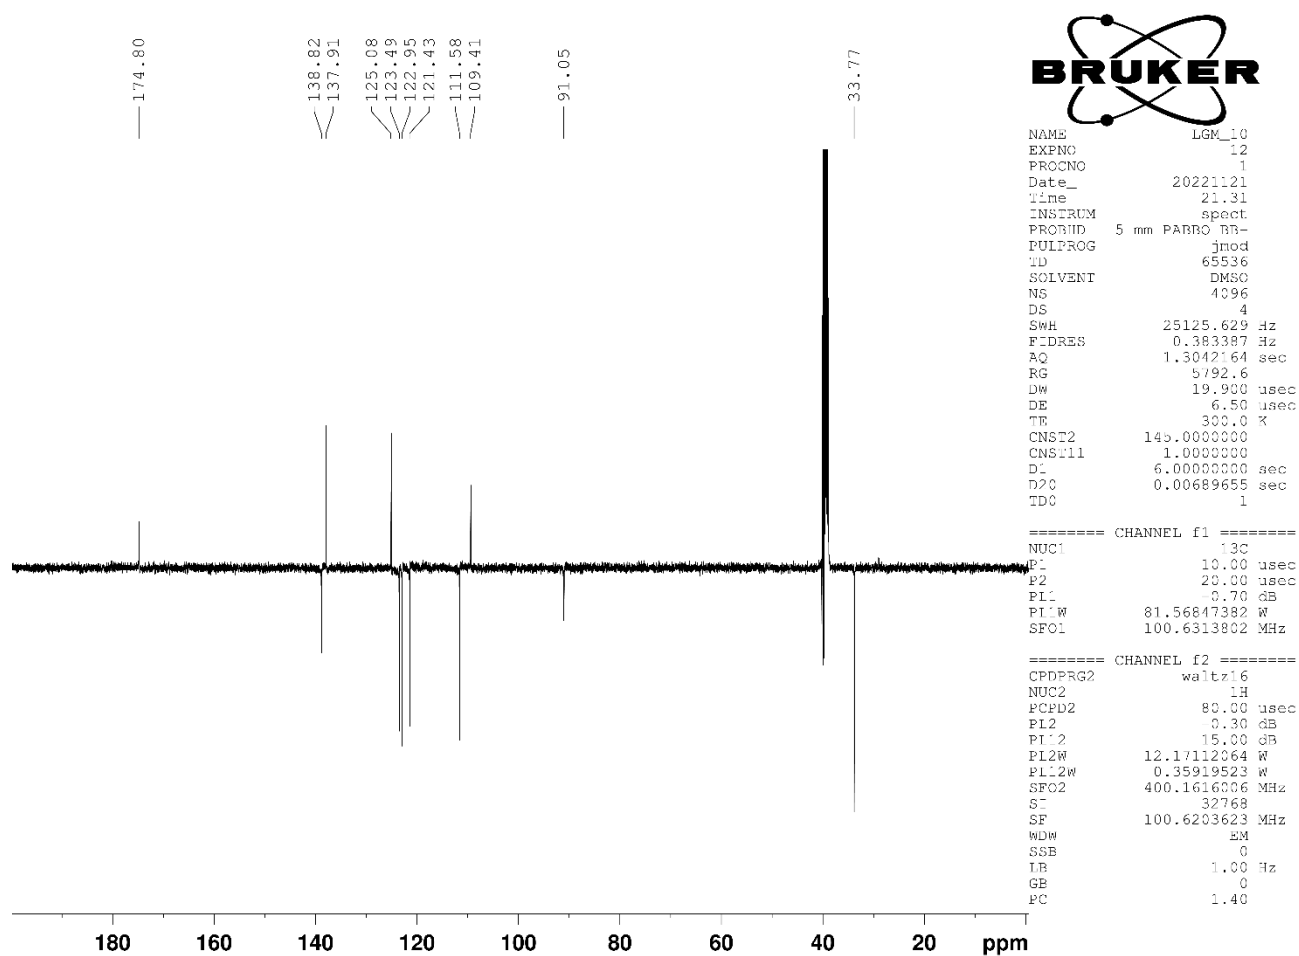

### S2.3. $^{19}\text{F}$ -NMR spectrum of BF2BIP (4a)

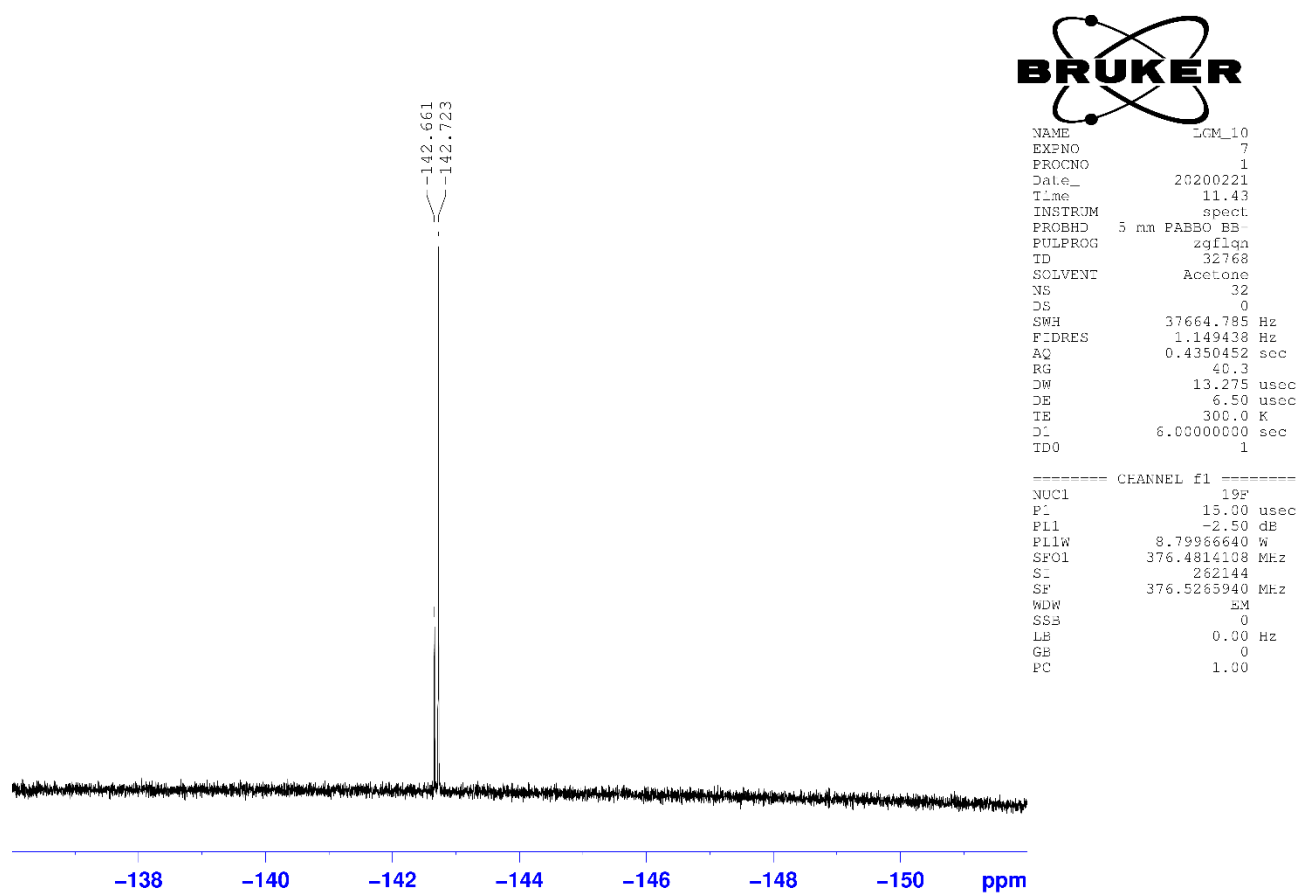



## S2.4. $^{11}\text{B}$ -NMR spectrum of BF<sub>2</sub>BIP (4a)

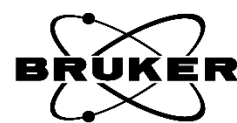

```

NAME          LGM_10
EXPNO         4
PROCNO        2
Date_         20200227
Time          12.39
INSTRUM       spect
PROBHD        5 mm PABBO BB-
PULPROG       zg
TD            65536
SOLVENT       Acetone
NS            585
DS            2
SWH           6410.256 Hz
FIDRES        0.097813 Hz
AQ            3.1118579 sec
RG            29193
DW            78.000 usec
DE            6.50 usec
TE            300.0 K
D1            5.0000000 sec
TD0           1

===== CHANNEL f1 =====
NUC1          11B
P1            10.20 usec
PL1           -0.70 dB
PL1W          81.56847382 W
SFO1          128.3871016 MHz
ST            32768
SF            128.3872300 MHz
WDW           EM
SSB           0
LB            1.00 Hz
GB            0
PC            1.00

```

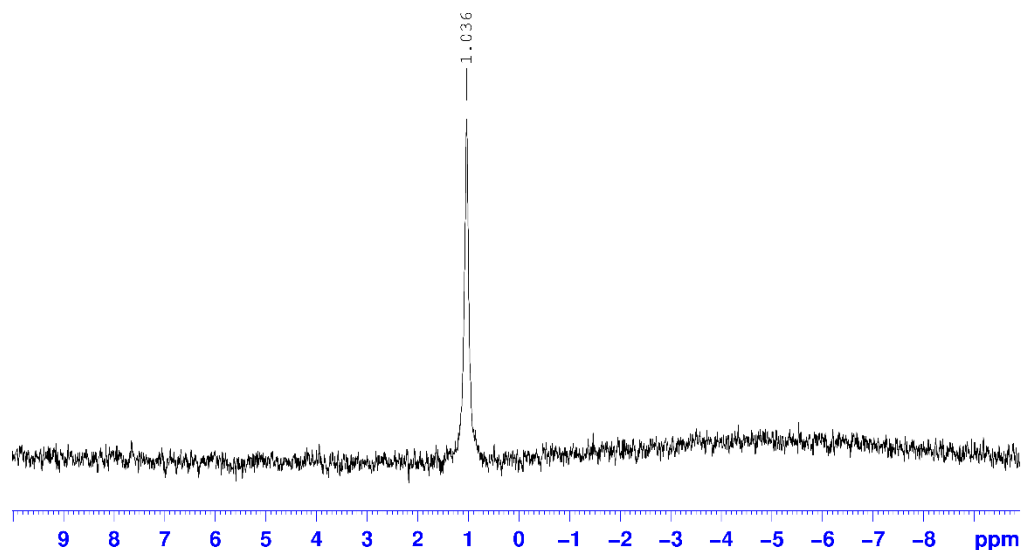

### S3. NMR spectroscopy data on 4b

#### S3.1. $^1\text{H}$ -NMR spectrum of BF<sub>2</sub>CIBIP (4b)

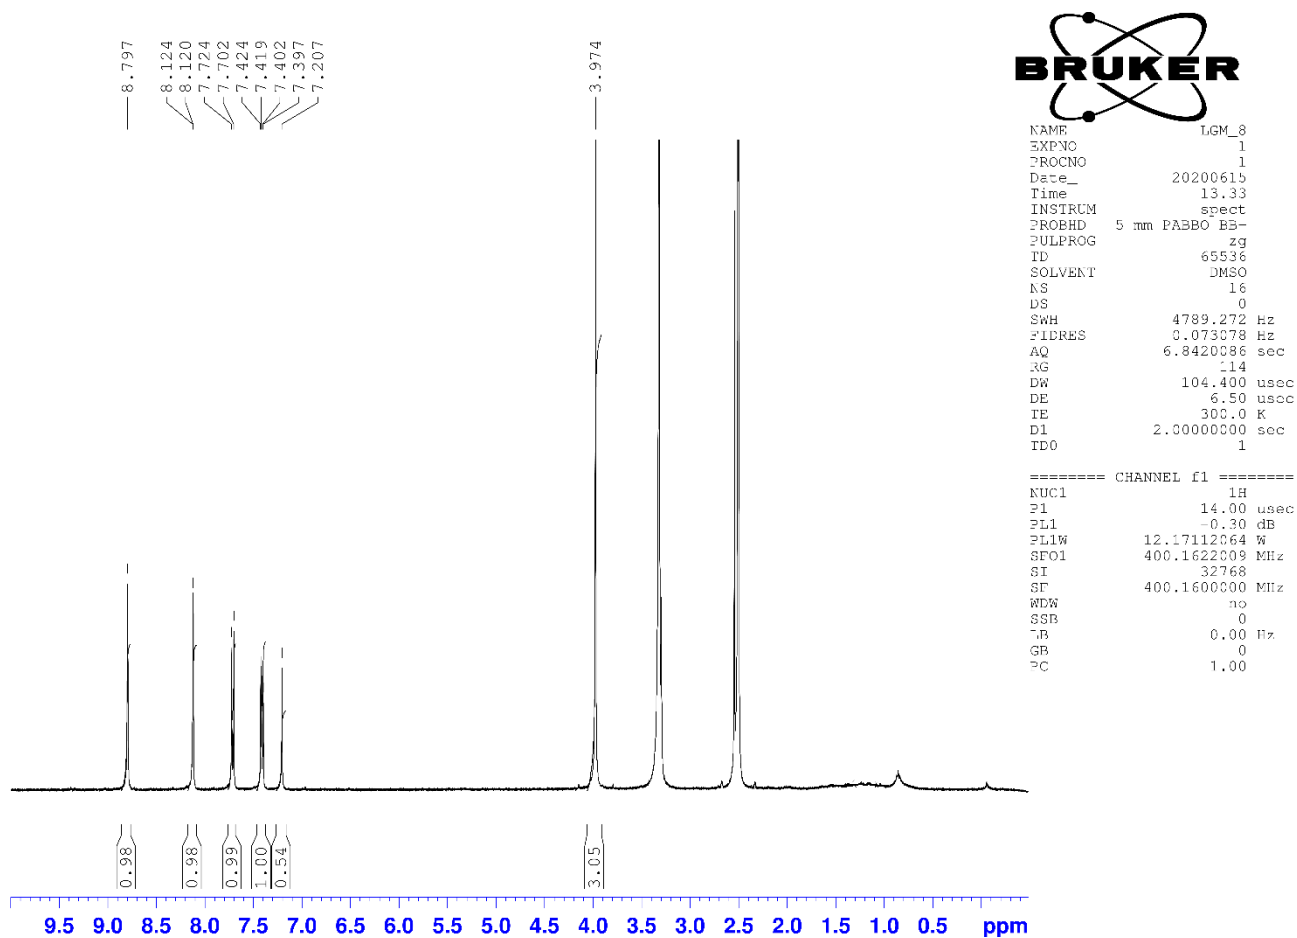

### S3.2. $^{13}\text{C}$ -NMR spectrum of BF<sub>2</sub>CIBIP (4b)

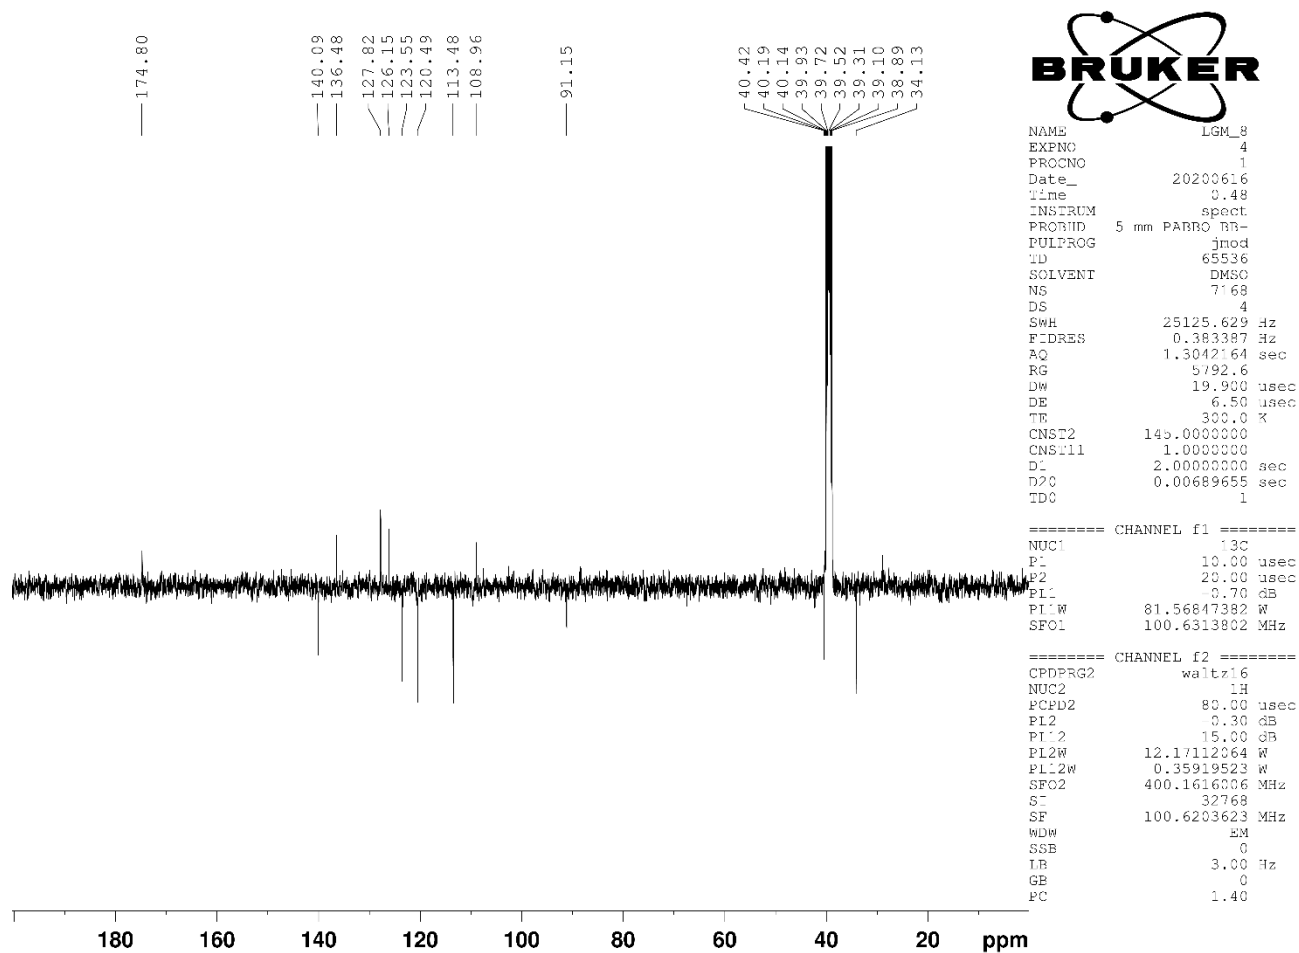

### S3.3. $^{19}\text{F}$ -NMR spectrum of BF<sub>2</sub>CIBIP (4b)

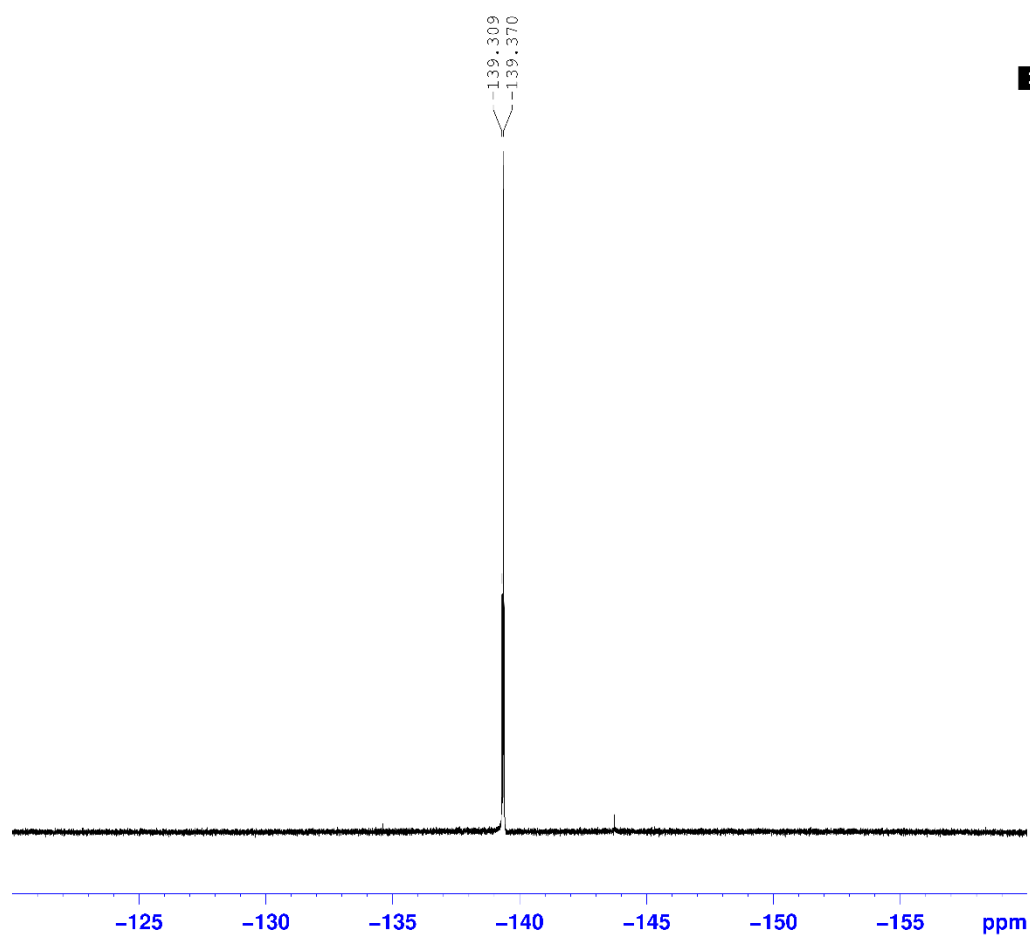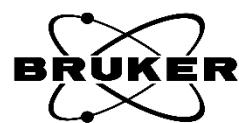

```

NAME          LGM_8
EXPNO         3
PROCNO        1
Date_         20200615
Time          14.14
INSTRUM       spect
PROBHD        5 mm PABBO BB-
PULPROG       zgpg30
TD            32768
SOLVENT       DMSO
NS            32
DS            0
SWH           30120.492 Hz
FIDRES        0.919204 Hz
AQ            0.5439988 sec
RG            40.3
DW            16.600 usec
DE            6.50 usec
TE            300.0 K
D1            6.0000000 sec
TD0           1

----- CHANNEL f1 -----
NUC1          19F
P1            15.00 usec
PL1           -2.50 dB
PL1W          8.79966640 W
SFO1          376.4757629 MHz
SI            262144
SF            376.5265940 MHz
WDW           EM
SSB           0
LB            0.00 Hz
GB            0
PC            1.00
    
```

### S3.4. $^{11}\text{B}$ -NMR spectrum of BF<sub>2</sub>ClBIP (4b)

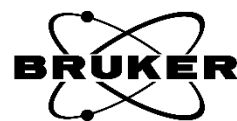

```

NAME          LCM_8
EXPNO         2
PROCNO        2
Date_         20200615
Time          13.41
INSTRUM       spect
PROBHD        5 mm PABBO BB-
PULPROG       zg
TD            65536
SOLVENT       DMSO
NS            128
DS            2
SWH           6410.256 Hz
FIDRES        0.097813 Hz
AQ            5.1118579 sec
RG            29193
PW            78.000 usec
DE            6.50 usec
TE            300.1 K
D1            5.00000000 sec
TD0           1
----- CHANNEL f1 -----
NUC1          11B
P1            10.20 usec
PL1           -0.70 dB
PL1W          81.56847382 W
SFO1          128.3871016 MHz
SI            65536
SF            128.3872300 MHz
WDW           EM
SSB           0
LB            2.00 Hz
GB            0
PC            1.00
  
```

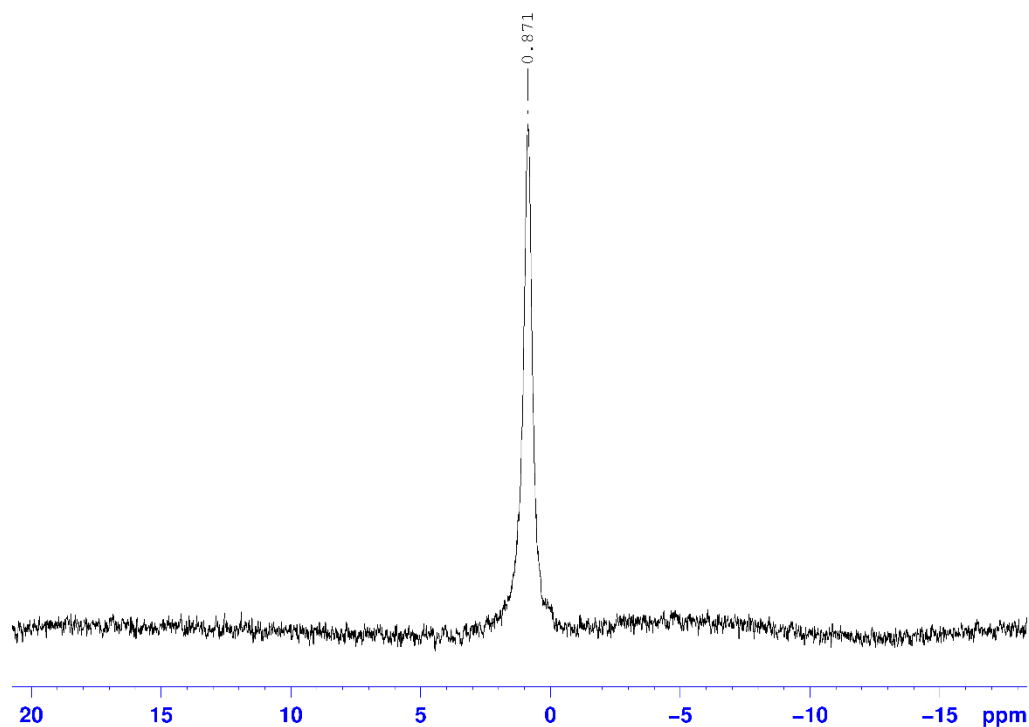

## S4. NMR spectroscopy data on 4c

### S4.1. <sup>1</sup>H-NMR spectrum of BF<sub>2</sub>BMIP (4c)

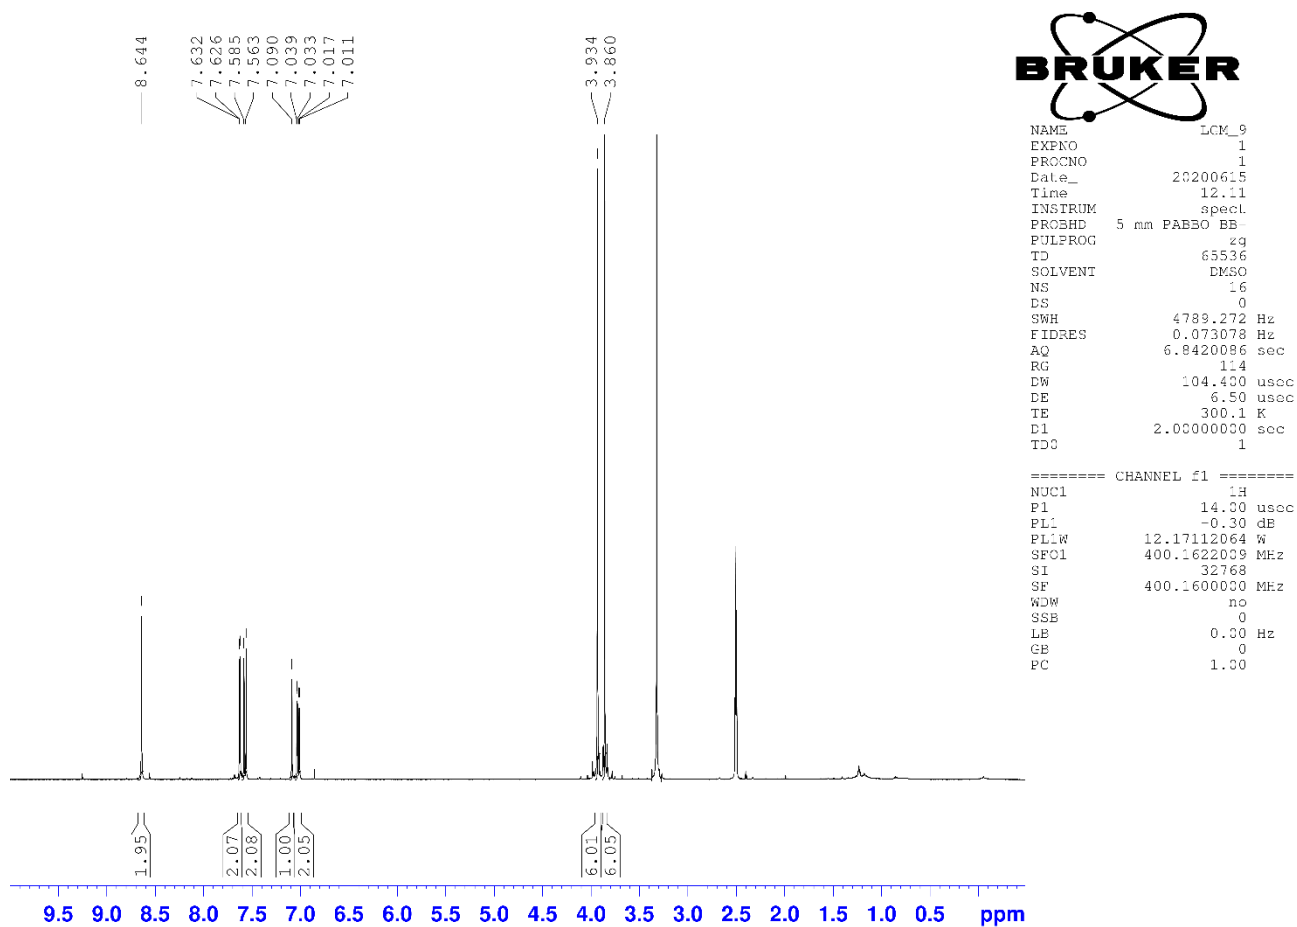

# S4.2. <sup>13</sup>C-NMR spectrum of BF2BMIP (4c)

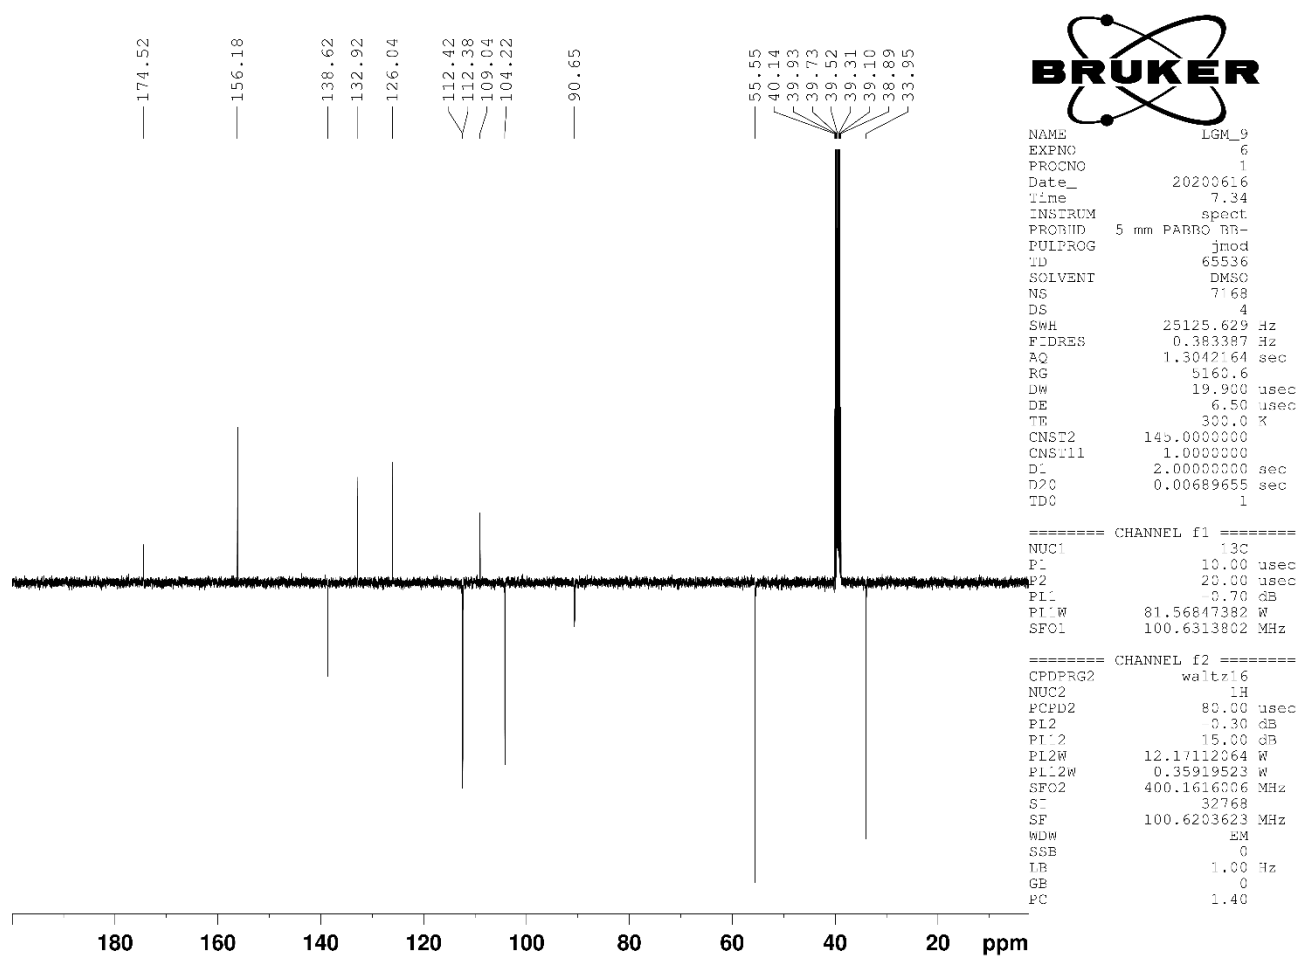

### S4.3. $^{19}\text{F}$ -NMR spectrum of BF<sub>2</sub>BMIP (4c)

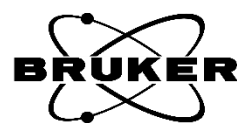

```
NAME          LCM_9
EXPNO         4
PROCNO        1
Date_         20200615
Time          14.29
INSTRUM       spect
PROBHD        5 mm PABBO BB
PULPROG       zgpg30
TD            32768
SOLVENT       DMSO
NS            32
DS            0
SWH           30120.482 Hz
FIDRES        0.919204 Hz
AQ            0.5439988 sec
RG            40.3
DW            16.600 usec
DE            6.50 usec
TE            300.0 K
D1            6.00000000 sec
TD0           1

----- CHANNEL f1 -----
NUC1          19F
P1            15.00 usec
PL1           -2.50 dB
PL1W          8.79966640 W
SFO1          376.4757629 MHz
SI            262144
SF            376.5265940 MHz
WDW           EM
SSB           0
LB            0.00 Hz
GB            0
PC            1.00
```

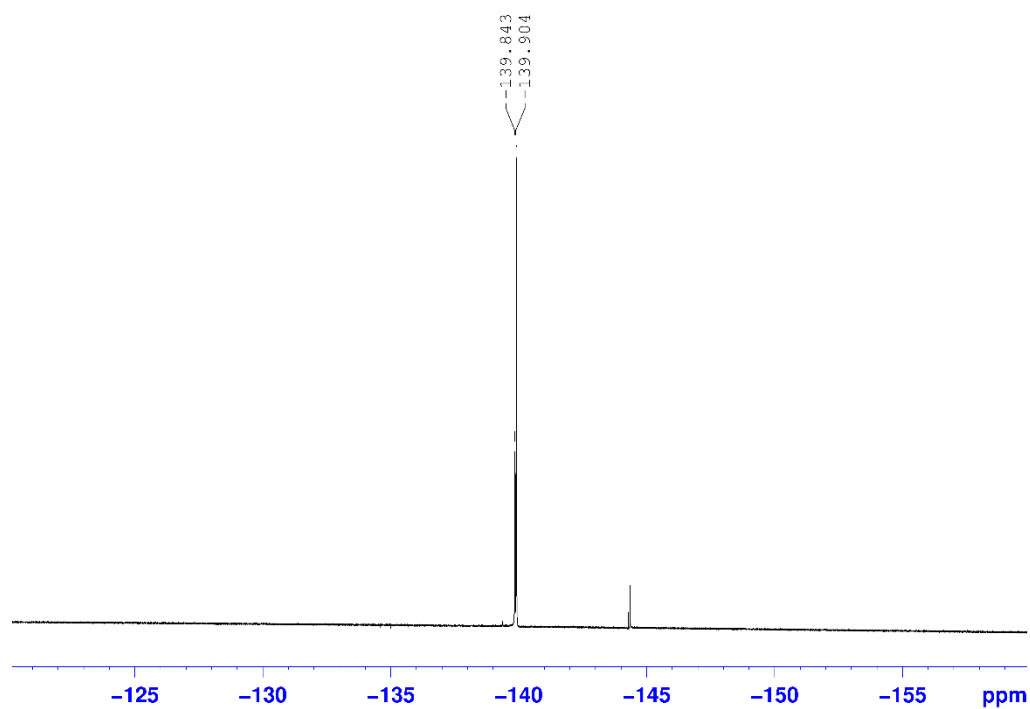



#### S4.4. $^{11}\text{B}$ -NMR spectrum of BF<sub>2</sub>BMIP (4c)

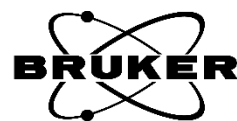

```

NAME          LCK_9
EXPNO         3
PROCNO        2
Date_         20200615
Time          12.57
INSTRUM       spect
PROBHD        5 mm PABBO BB
PULPROG       zg
TD            65536
SOLVENT       DMSO
NS            128
DS            2
SWH           6410.256 Hz
FIDRES        0.097813 Hz
AQ            5.1118579 sec
RG            29193
DW            78.000 usec
DE            6.50 usec
TE            300.0 K
D1            5.00000000 sec
TDC           1

===== CHANNEL f1 =====
NUC1          11B
P1            10.20 usec
PL1           -0.70 dB
PL1W          81.56847382 W
SFO1          128.3871016 MHz
SI            65536
SF            128.3872300 MHz
WDW           EM
SSB           0
LB            1.00 Hz
GB            0
PC            1.00
  
```

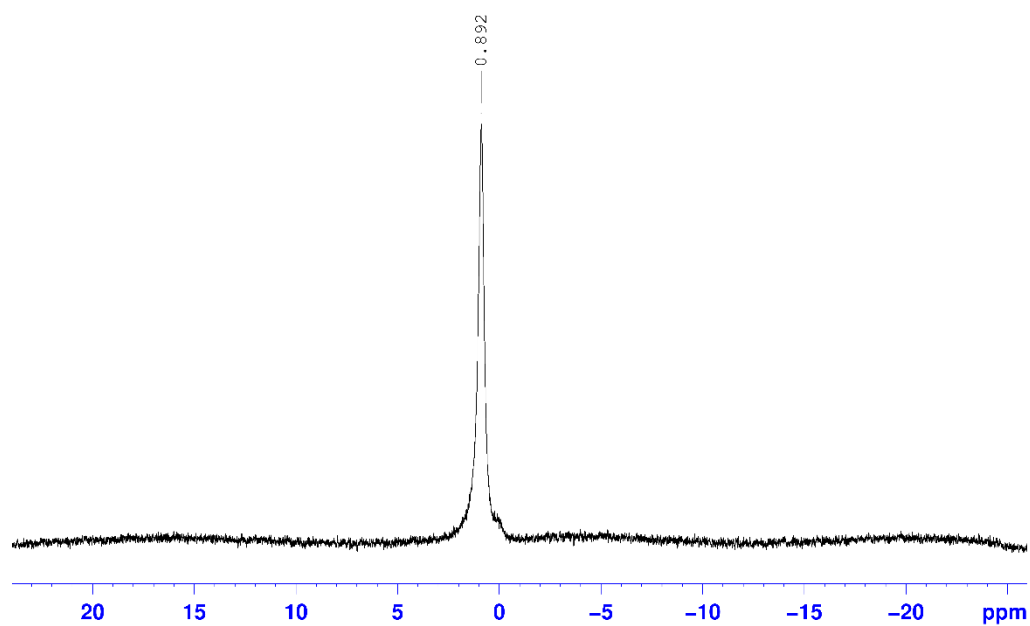

## S5. IR spectra

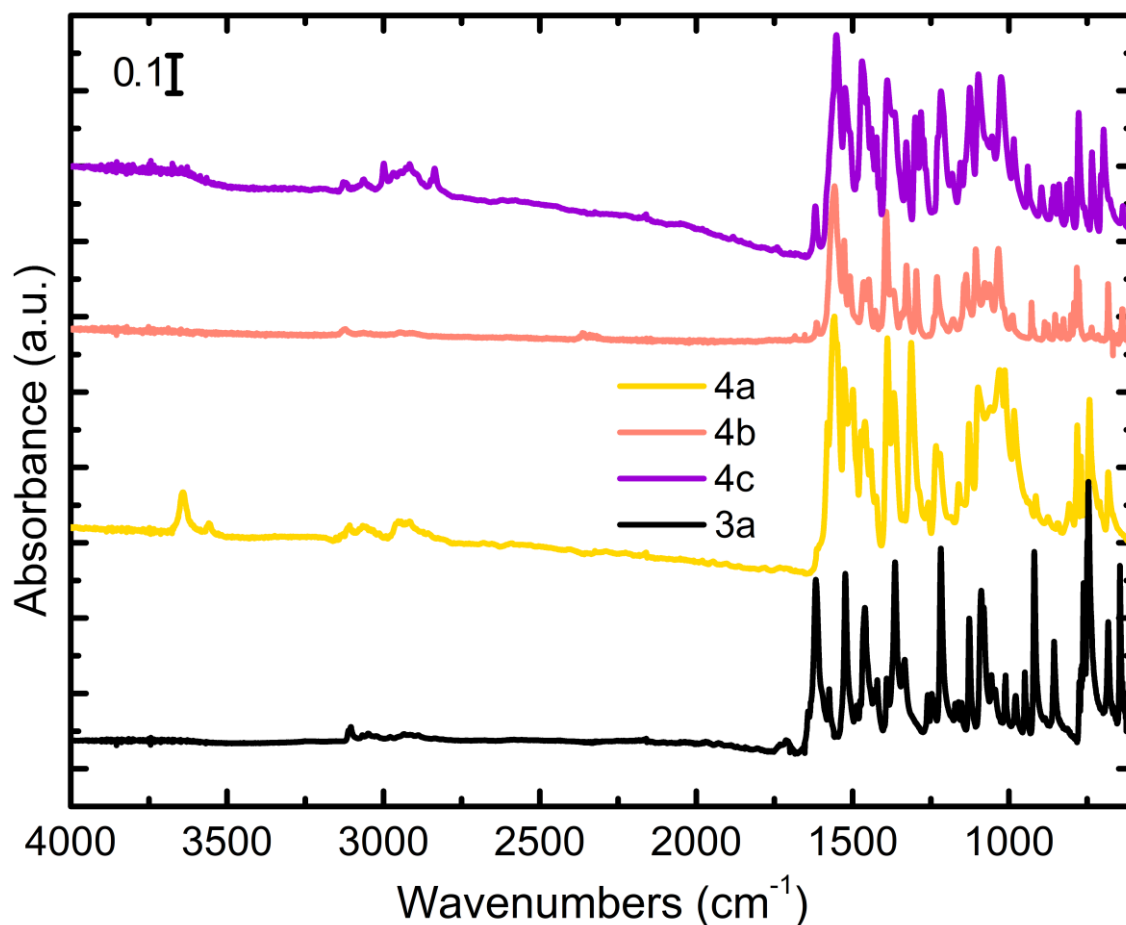

**Figure S1.** ATR-IR spectra recorded on loose powders in the air of **3a** before (black curve) and after difluoroboronation (**4a**, yellow curve), **4b** (pink), **4c** (violet). The peaks at  $\sim 3600$   $\text{cm}^{-1}$  in **4a** are associated to impurities (based on NMR spectra, boronic acids formed from the decomposition of  $\text{BF}_3$ ).

**Table S1.** Carbonyl stretching frequency ( $\tilde{\nu}_{\text{C=O}}$ ) as measured by ATR-IR in the air of the as-synthesized bdks (**3**) and  $\text{BF}_2$ bdks (**4**). The corresponding experimental shift of this frequency are also reported ( $\Delta\tilde{\nu}_{\text{C=O}}$ ). All the values are in  $\text{cm}^{-1}$ .

| Entry    | $\tilde{\nu}_{\text{C=O}}$ bdk <b>3</b> | $\tilde{\nu}_{\text{C=O}}$ $\text{BF}_2$ bdk <b>4</b> | $\Delta\tilde{\nu}_{\text{C=O}}$ |
|----------|-----------------------------------------|-------------------------------------------------------|----------------------------------|
| <b>a</b> | 1618                                    | 1560                                                  | -58                              |
| <b>b</b> | 1630                                    | 1557                                                  | -73                              |
| <b>c</b> | 1617                                    | 1555                                                  | -62                              |

The computed DFT spectra for the three conformers of **3a** are reported in Figure S2. The calculations confirm the redshift of the carbonyl stretching mode after difluoroboronation (**4a**, yellow curve), although the computed  $\Delta\tilde{\nu}_{\text{C=O}}$  are on average larger than the experimental values: -126 (trans-diketo, black curve), -163 (cis-diketo, pink), -42  $\text{cm}^{-1}$  (keto-enol, violet) as computed at the B3LYP level. The difference between the computed and the experimental values is likely associated to the conditions used in the calculations (gas phase) and in the experiment (bulk phase).

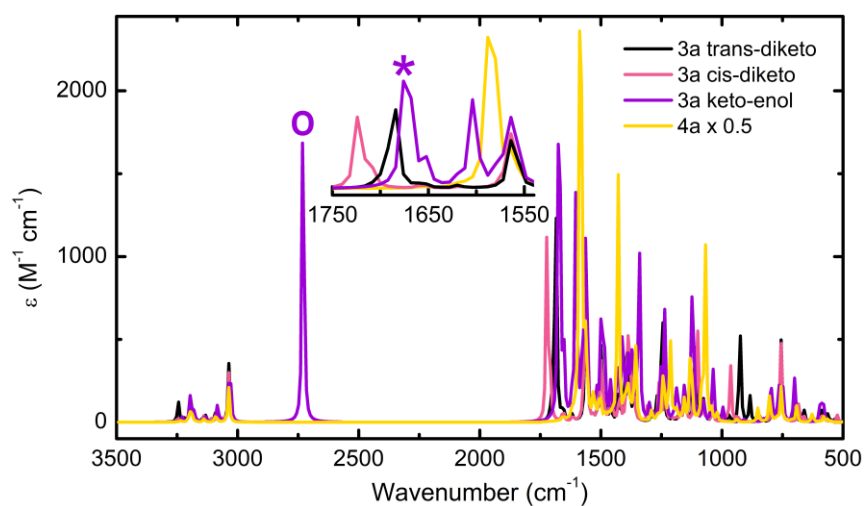

**Figure S2.** Theoretical IR spectra computed at the B3LYP/def2-TZVPD in the gas phase for the three possible conformers of **3a**: trans-diketo (black curve), cis-diketo (pink), keto-enol (violet). “O” and “\*” mark the O-H stretching and bending modes in keto-enol, respectively. The spectrum of the corresponding BF<sub>2</sub>bdk **4a** is also shown for comparison (yellow curve). Inset: enlarged view of the carbonyl stretching region.

## S6. Supplementary experimental UV-Vis absorption spectroscopy data

The UV-Vis absorption spectra of **3a**, **3b**, and **3c** in different solvents are shown in Figure S3.

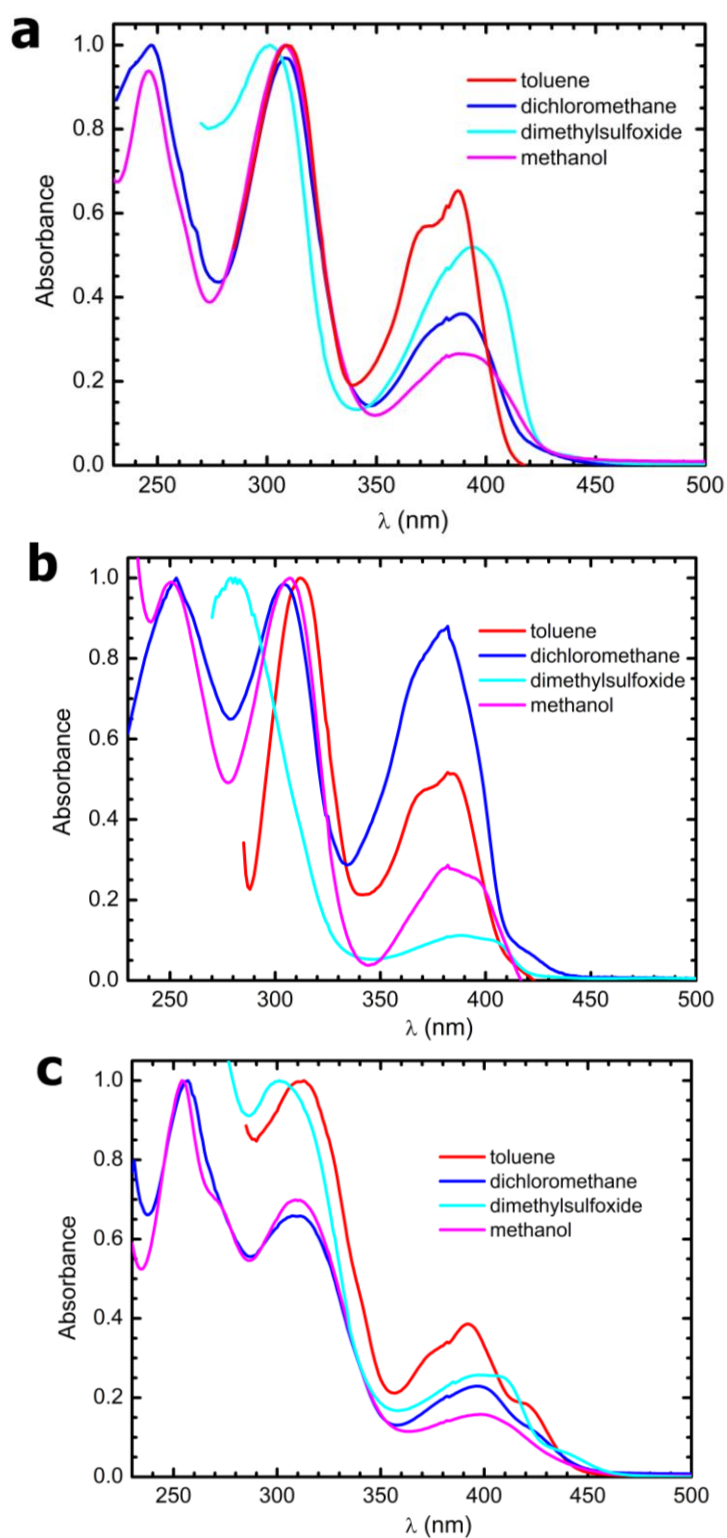

**Figure S3.** UV-Vis absorption spectra of HBIP (**3a**, top), BCIIP (**3b**, middle) and BMIP (**3c**, below) in representative solvents.

## S7. Supplementary theoretical UV-Vis absorption spectra and data

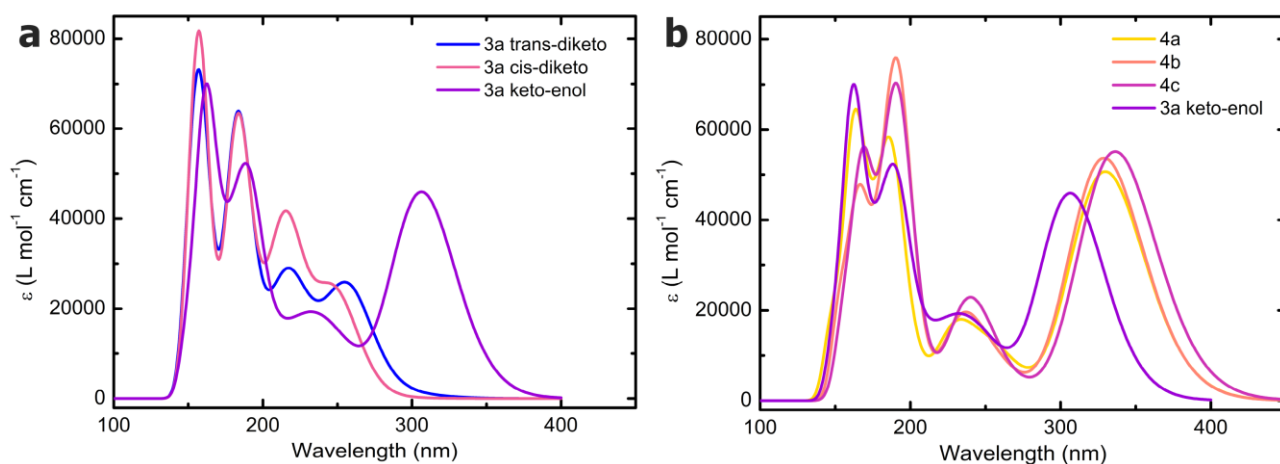

**Figure S4.** Electronic absorption spectra of (a) the three conformers of **3a** and (b) the BF<sub>2</sub>bdks compounds as computed at the TDA- $\omega$ B97X-D/def2-TZVPD including the first 100 excitations.

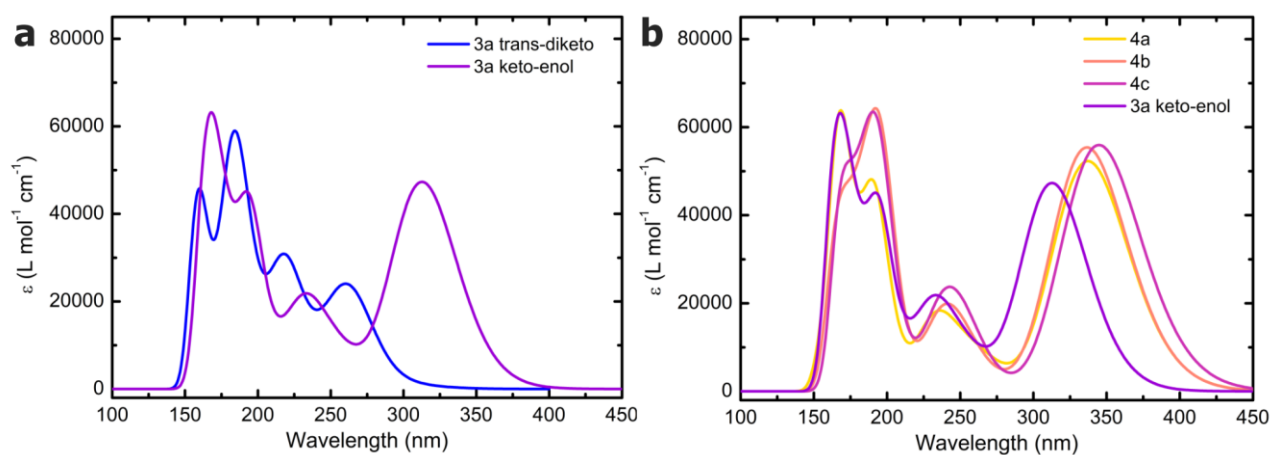

**Figure S5.** Electronic absorption spectra of (a) the three conformers of **3a** and (b) the BF<sub>2</sub>bdks compounds as computed at the TDA-M06-2X/def2-TZVPD including the first 100 excitations.

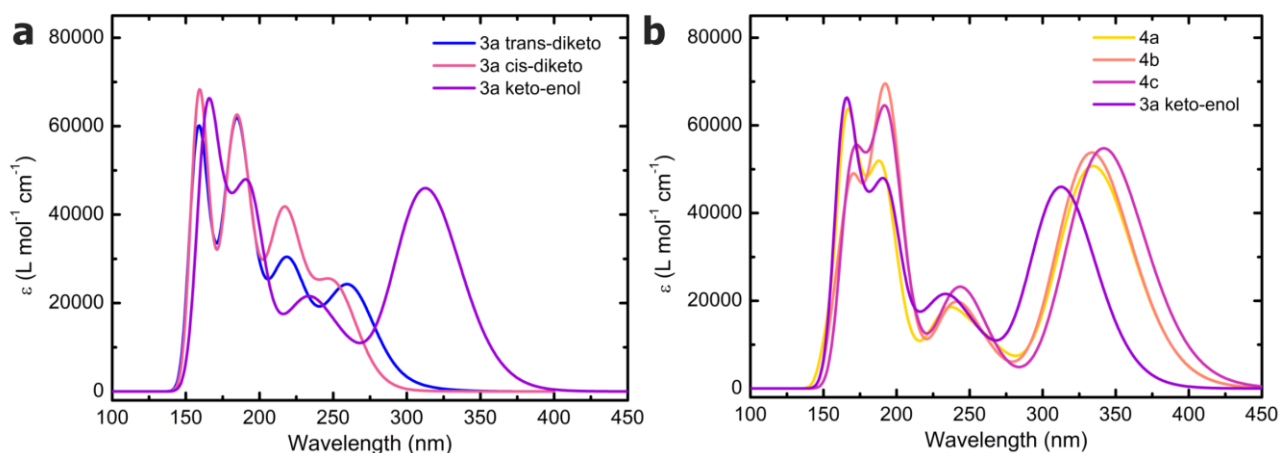

**Figure S6.** Electronic absorption spectra of (a) the three conformers of **3a** and (b) the BF<sub>2</sub>bdks compounds as computed at the TDA-CAM-B3LYP-D3/def2-TZVPD including the first 100 excitations.

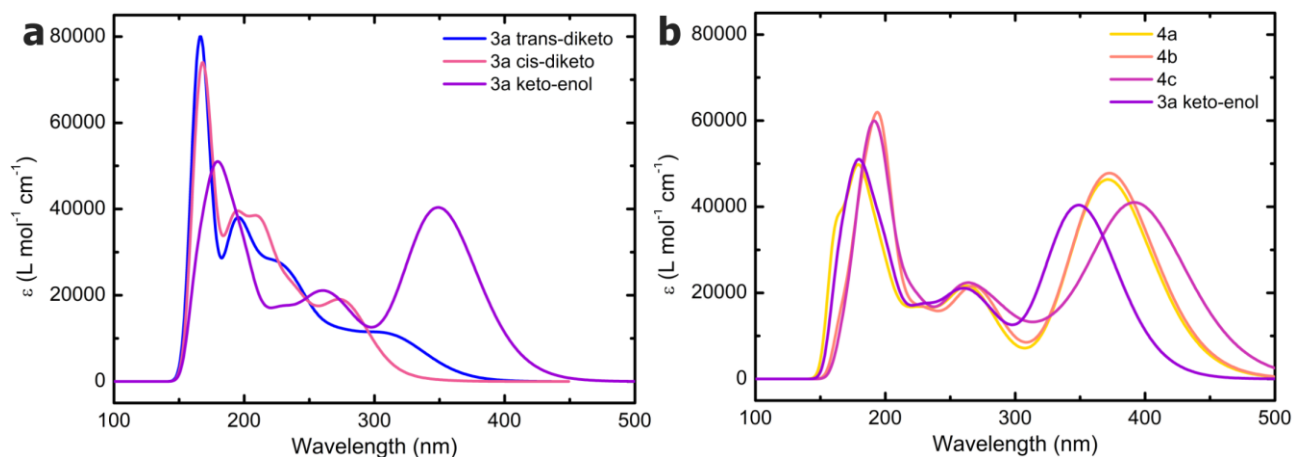

**Figure S7.** Electronic absorption spectra of (a) the three conformers of **3a** and (b) the BF<sub>2</sub>bdks compounds as computed at the TDA-B3LYP-D3/def2-TZVPD including the first 100 excitations.

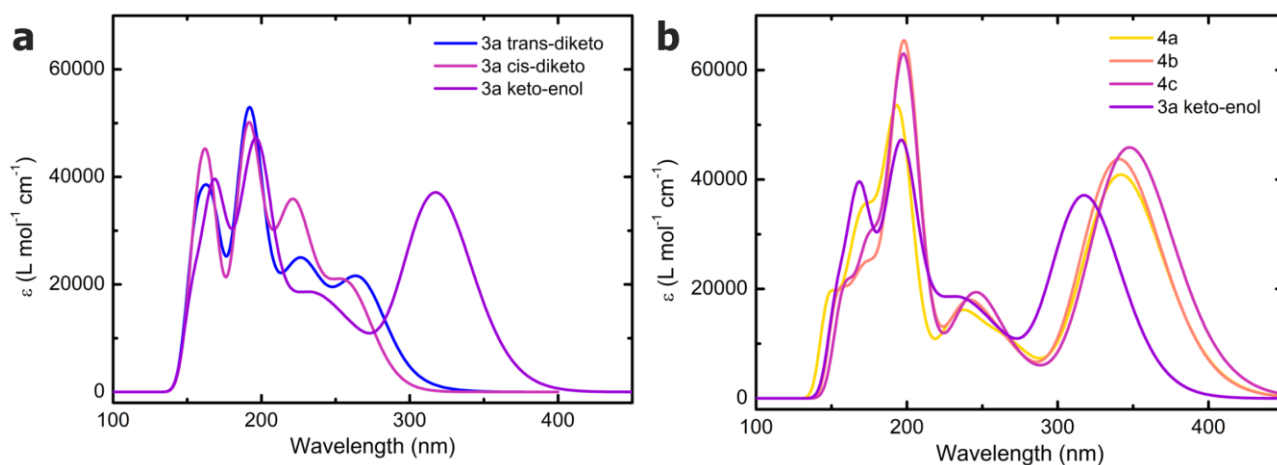

**Figure S8.** Electronic absorption spectra of (a) the three conformers of **3a** and (b) the BF<sub>2</sub>bdks compounds as computed at the TD- $\omega$ B97X-D/def2-TZVPD including the first 100 excitations.

## S7.1. TD-B3LYP-D3: Excitation energies and oscillator strengths of the first excited states

### 3a keto-enol

87 HOMO, 88 LUMO

Excited State 1: Singlet-A 3.4247 eV 362.02 nm f=0.7873 <S\*\*2>=0.000  
87 -> 88 0.70215  
This state for optimization and/or second-order correction.  
Total Energy, E(TD-HF/TD-DFT) = -1071.41850459  
Copying the excited state density for this state as the 1-particle RhoCI density.

Excited State 2: Singlet-A 3.9809 eV 311.45 nm f=0.0001 <S\*\*2>=0.000  
82 -> 88 0.67923

Excited State 3: Singlet-A 4.0132 eV 308.94 nm f=0.0006 <S\*\*2>=0.000  
84 -> 88 0.10257  
85 -> 88 -0.10853  
86 -> 88 -0.41945  
87 -> 89 0.53520

### 3a cis-diketo

87 HOMO, 88 LUMO

Excited State 1: Singlet-A 3.8096 eV 325.45 nm f=0.0075 <S\*\*2>=0.000  
82 -> 88 0.16969  
84 -> 88 -0.16259  
87 -> 88 0.65105  
This state for optimization and/or second-order correction.  
Total Energy, E(TD-HF/TD-DFT) = -1071.39857189  
Copying the excited state density for this state as the 1-particle RhoCI density.

Excited State 2: Singlet-A 3.8330 eV 323.46 nm f=0.0020 <S\*\*2>=0.000  
82 -> 88 -0.40108  
82 -> 90 0.13407  
84 -> 88 0.46566  
84 -> 90 -0.12042  
87 -> 88 0.25657

Excited State 3: Singlet-A 3.9552 eV 313.47 nm f=0.0010 <S\*\*2>=0.000  
82 -> 89 0.18655  
84 -> 89 0.61163  
84 -> 91 0.18304  
86 -> 89 -0.16251

Excited State 4: Singlet-A 4.2665 eV 290.60 nm f=0.1496 <S\*\*2>=0.000  
82 -> 88 -0.19292  
86 -> 88 0.48338  
87 -> 89 0.44092

### 3a trans-diketo

87 HOMO, 88 LUMO

Excited State 1: Singlet-A 3.7419 eV 331.34 nm f=0.0831 <S\*\*2>=0.000  
82 -> 89 0.14560  
83 -> 88 0.57985  
87 -> 88 -0.34553  
This state for optimization and/or second-order correction.  
Total Energy, E(TD-HF/TD-DFT) = -1071.41128221  
Copying the excited state density for this state as the 1-particle RhoCI density.

Excited State 2: Singlet-A 3.9447 eV 314.30 nm f=0.0212 <S\*\*2>=0.000  
82 -> 88 -0.12465  
86 -> 88 0.66244  
87 -> 89 0.14646

Excited State 3: Singlet-A 3.9450 eV 314.28 nm f=0.1423 <S\*\*2>=0.000  
83 -> 88 0.31898  
86 -> 89 0.10968  
87 -> 88 0.59930

#### 4a

98 HOMO, 99 LUMO

Excited State 1: Singlet-A 3.2070 ev 386.60 nm f=0.8815 <S\*\*2>=0.000  
98 -> 99 0.70450  
This state for optimization and/or second-order correction.  
Total Energy, E(TD-HF/TD-DFT) = -1295.66360691  
Copying the excited state density for this state as the 1-particle RhoCI density.

Excited State 2: Singlet-A 3.8302 ev 323.70 nm f=0.0283 <S\*\*2>=0.000  
97 -> 99 0.67666  
98 ->100 0.16215

Excited State 3: Singlet-A 3.9196 ev 316.32 nm f=0.0002 <S\*\*2>=0.000  
95 -> 99 0.65628  
97 -> 99 0.12835  
98 ->100 -0.21155

#### 4b

114 HOMO, 115 LUMO

Excited State 1: Singlet-A 3.2105 ev 386.18 nm f=0.9422 <S\*\*2>=0.000  
114 -> 115 0.70129  
This state for optimization and/or second-order correction.  
Total Energy, E(TD-HF/TD-DFT) = -2214.92008102  
Copying the excited state density for this state as the 1-particle RhoCI density.

Excited State 2: Singlet-A 3.6795 ev 336.96 nm f=0.0009 <S\*\*2>=0.000  
111 -> 115 -0.19951  
113 -> 115 0.66962

Excited State 3: Singlet-A 3.7437 ev 331.18 nm f=0.0035 <S\*\*2>=0.000  
112 -> 115 0.69260

#### 4c

114 HOMO, 115 LUMO

Excited State 1: Singlet-A 3.0596 ev 405.23 nm f=0.8498 <S\*\*2>=0.000  
114 -> 115 0.70059  
This state for optimization and/or second-order correction.  
Total Energy, E(TD-HF/TD-DFT) = -1524.81651337  
Copying the excited state density for this state as the 1-particle RhoCI density.

Excited State 2: Singlet-A 3.3875 ev 366.00 nm f=0.0006 <S\*\*2>=0.000  
113 -> 115 0.69728

Excited State 3: Singlet-A 3.6135 ev 343.12 nm f=0.1013 <S\*\*2>=0.000  
112 -> 115 0.69440

### S7.2. TDA-B3LYP-D3: Excitation energies and oscillator strengths of the first excited states

#### 3a keto-enol

87 HOMO, 88 LUMO

Excited State 1: Singlet-A 3.5491 ev 349.34 nm f=0.9917 <S\*\*2>=0.000  
87 -> 88 0.68865  
This state for optimization and/or second-order correction.  
Total Energy, E(CIS/TDA) = -1071.41393316  
Copying the excited state density for this state as the 1-particle RhoCI density.

Excited State 2: Singlet-A 3.9946 ev 310.38 nm f=0.0001 <S\*\*2>=0.000  
82 -> 88 0.68211



Excited State 3: Singlet-A 4.0481 eV 306.27 nm f=0.0013 <S\*\*2>=0.000  
 84 -> 88 0.11597  
 85 -> 88 -0.13822  
 86 -> 88 -0.38677  
 87 -> 89 0.55022

### 3a cis-diketo

87 HOMO, 88 LUMO

Excited State 1: Singlet-A 3.8161 eV 324.90 nm f=0.0084 <S\*\*2>=0.000  
 82 -> 88 0.10938  
 87 -> 88 0.67921  
 This state for optimization and/or second-order correction.  
 Total Energy, E(CIS/TDA) = -1071.39833283  
 Copying the excited state density for this state as the 1-particle RhoCI density.

Excited State 2: Singlet-A 3.8505 eV 321.99 nm f=0.0028 <S\*\*2>=0.000  
 82 -> 88 -0.41869  
 82 -> 90 0.13853  
 84 -> 88 0.48938  
 84 -> 90 -0.12342  
 87 -> 88 0.15888

Excited State 3: Singlet-A 3.9753 eV 311.89 nm f=0.0011 <S\*\*2>=0.000  
 82 -> 89 0.18370  
 84 -> 89 0.61252  
 84 -> 91 0.18039  
 86 -> 89 -0.16374

Excited State 4: Singlet-A 4.3454 eV 285.32 nm f=0.0011 <S\*\*2>=0.000  
 85 -> 88 0.65914  
 86 -> 88 -0.13378  
 87 -> 89 -0.13424

Excited State 5: Singlet-A 4.3697 eV 283.74 nm f=0.1722 <S\*\*2>=0.000  
 82 -> 88 -0.30926  
 84 -> 88 -0.17148  
 85 -> 88 0.23400  
 86 -> 88 0.41641  
 87 -> 89 0.30592

### 3a trans-diketo

87 HOMO, 88 LUMO

Excited State 1: Singlet-A 3.7661 eV 329.21 nm f=0.0850 <S\*\*2>=0.000  
 82 -> 89 0.15024  
 83 -> 88 0.59178  
 87 -> 88 -0.31966  
 This state for optimization and/or second-order correction.  
 Total Energy, E(CIS/TDA) = -1071.41039462  
 Copying the excited state density for this state as the 1-particle RhoCI density.

Excited State 2: Singlet-A 3.9927 eV 310.52 nm f=0.1414 <S\*\*2>=0.000  
 83 -> 88 0.29240  
 86 -> 89 0.19591  
 87 -> 88 0.59091

Excited State 3: Singlet-A 3.9932 eV 310.49 nm f=0.0186 <S\*\*2>=0.000  
 82 -> 88 -0.16690  
 83 -> 89 -0.12654  
 86 -> 88 0.61689  
 87 -> 89 0.23781

### 4a

98 HOMO, 99 LUMO

Excited State 1: Singlet-A 3.3366 eV 371.59 nm f=1.1408 <S\*\*2>=0.000  
 98 -> 99 0.69334  
 This state for optimization and/or second-order correction.  
 Total Energy, E(CIS/TDA) = -1295.65884438

Copying the excited state density for this state as the 1-particle RhoCI density.

Excited State 2: Singlet-A 3.9015 ev 317.79 nm f=0.0190 <S\*\*2>=0.000  
 95 -> 99 -0.23319  
 97 -> 99 0.58747  
 98 -> 100 0.29024

Excited State 3: Singlet-A 3.9639 ev 312.78 nm f=0.0017 <S\*\*2>=0.000  
 95 -> 99 0.62057  
 97 -> 99 0.29500  
 98 -> 100 -0.11722

#### 4b

114 HOMO, 115 LUMO

Excited State 1: Singlet-A 3.3228 ev 373.13 nm f=1.1695 <S\*\*2>=0.000  
 112 -> 115 -0.14749  
 114 -> 115 0.68405

This state for optimization and/or second-order correction.

Total Energy, E(CIS/TDA) = -2214.91595357

Copying the excited state density for this state as the 1-particle RhoCI density.

Excited State 2: Singlet-A 3.7238 ev 332.95 nm f=0.0026 <S\*\*2>=0.000  
 111 -> 115 -0.25441  
 113 -> 115 0.64664

Excited State 3: Singlet-A 3.8001 ev 326.27 nm f=0.0386 <S\*\*2>=0.000  
 112 -> 115 0.67468  
 114 -> 115 0.13424

#### 4c

114 HOMO, 115 LUMO

Excited State 1: Singlet-A 3.1431 ev 394.47 nm f=0.9753 <S\*\*2>=0.000  
 112 -> 115 -0.15674  
 114 -> 115 0.68445

This state for optimization and/or second-order correction.

Total Energy, E(CIS/TDA) = -1524.81344658

Copying the excited state density for this state as the 1-particle RhoCI density.

Excited State 2: Singlet-A 3.4386 ev 360.56 nm f=0.0014 <S\*\*2>=0.000  
 111 -> 115 -0.11489  
 113 -> 115 0.68862

Excited State 3: Singlet-A 3.7037 ev 334.76 nm f=0.2405 <S\*\*2>=0.000  
 112 -> 115 0.67211  
 114 -> 115 0.14773

Excited State 4: Singlet-A 3.9019 ev 317.75 nm f=0.0002 <S\*\*2>=0.000  
 111 -> 115 0.45519  
 114 -> 116 0.52300

Excited State 5: Singlet-A 4.2324 ev 292.94 nm f=0.1124 <S\*\*2>=0.000  
 109 -> 115 -0.12204  
 111 -> 115 0.49539  
 114 -> 116 -0.44998

### S7.3. TDA- $\omega$ B97X-D: Excitation energies and oscillator strengths of the first excited states

#### 3a keto-enol

87 HOMO, 88 LUMO

Excited State 1: Singlet-A 4.0442 ev 306.58 nm f=1.1314 <S\*\*2>=0.000  
 83 -> 88 0.11660  
 87 -> 88 0.66536

This state for optimization and/or second-order correction.

Total Energy, E(CIS/TDA) = -1070.93226768

Copying the excited state density for this state as the 1-particle RhoCI density.

Excited State 2: Singlet-A 4.3596 eV 284.39 nm f=0.0009 <S\*\*2>=0.000  
82 -> 88 0.64539  
82 -> 89 0.11441  
82 -> 91 0.15711  
83 -> 88 0.10033

Excited State 3: Singlet-A 4.8527 eV 255.50 nm f=0.1610 <S\*\*2>=0.000  
84 -> 88 -0.15318  
84 -> 96 0.11778  
86 -> 88 -0.33196  
86 -> 91 0.15728  
87 -> 89 0.51507  
87 -> 91 0.11107

### 3a cis-diketo

87 HOMO, 88 LUMO

Excited State 1: Singlet-A 4.1641 eV 297.75 nm f=0.0021 <S\*\*2>=0.000  
82 -> 88 0.46321  
82 -> 89 -0.10256  
82 -> 91 -0.25114  
83 -> 88 -0.35194  
83 -> 89 0.11171  
83 -> 91 0.18796

This state for optimization and/or second-order correction.

Total Energy, E(CIS/TDA) = -1070.92552459

Copying the excited state density for this state as the 1-particle RhoCI density.

Excited State 2: Singlet-A 4.2544 eV 291.42 nm f=0.0007 <S\*\*2>=0.000  
82 -> 89 0.23394  
82 -> 93 0.12336  
83 -> 88 0.12474  
83 -> 89 0.53174  
83 -> 93 0.28043

Excited State 3: Singlet-A 4.9015 eV 252.95 nm f=0.1682 <S\*\*2>=0.000  
86 -> 88 0.35050  
87 -> 88 0.24831  
87 -> 89 0.49118

Excited State 4: Singlet-A 4.9949 eV 248.22 nm f=0.3387 <S\*\*2>=0.000  
84 -> 88 0.10186  
84 -> 91 -0.10223  
84 -> 95 0.11479  
86 -> 88 0.53685  
87 -> 88 -0.15358  
87 -> 89 -0.30638

Excited State 5: Singlet-A 5.0172 eV 247.12 nm f=0.0180 <S\*\*2>=0.000  
84 -> 88 0.14681  
85 -> 88 0.14524  
85 -> 89 0.46564  
85 -> 93 -0.15392  
87 -> 88 0.10567  
87 -> 93 -0.29011  
87 -> 98 0.20787

### 3a trans-diketo

87 HOMO, 88 LUMO

Excitation energies and oscillator strengths:

Excited State 1: Singlet-A 4.1293 eV 300.26 nm f=0.0207 <S\*\*2>=0.000  
82 -> 89 0.22324  
82 -> 93 -0.17836  
83 -> 88 0.59029  
83 -> 90 -0.16359  
87 -> 88 0.11313

This state for optimization and/or second-order correction.

Total Energy, E(CIS/TDA) = -1070.93622230

Copying the excited state density for this state as the 1-particle RhoCI density.

Excited State 2: Singlet-A 4.3627 eV 284.19 nm f=0.0027 <S\*\*2>=0.000  
82 -> 88 0.47919

82 -> 90 -0.14227  
 83 -> 89 0.37114  
 83 -> 93 -0.26375

Excited State 3: Singlet-A 4.7932 ev 258.67 nm f=0.4866 <S\*\*2>=0.000  
 86 -> 89 0.23471  
 87 -> 88 0.60854

#### 4a

98 HOMO, 99 LUMO

Excited State 1: Singlet-A 3.7600 ev 329.75 nm f=1.2508 <S\*\*2>=0.000  
 94 -> 99 -0.13207  
 98 -> 99 0.66959

This state for optimization and/or second-order correction.

Total Energy, E(CIS/TDA) = -1295.11002172

Copying the excited state density for this state as the 1-particle RhoCI density.

Excited State 2: Singlet-A 4.7716 ev 259.84 nm f=0.1825 <S\*\*2>=0.000  
 95 -> 102 0.10139  
 97 -> 99 0.57703  
 98 -> 100 -0.31810

Excited State 3: Singlet-A 4.8580 ev 255.22 nm f=0.0001 <S\*\*2>=0.000  
 95 -> 99 0.47783  
 96 -> 100 0.24504  
 97 -> 99 -0.12465  
 97 -> 102 -0.20931  
 98 -> 100 -0.28672  
 98 -> 106 -0.14907

#### 4b

114 HOMO, 115 LUMO

Excited State 1: Singlet-A 3.7686 ev 328.99 nm f=1.3250 <S\*\*2>=0.000  
 110 -> 115 -0.12484  
 114 -> 115 0.66924

This state for optimization and/or second-order correction.

Total Energy, E(CIS/TDA) = -2214.33140936

Copying the excited state density for this state as the 1-particle RhoCI density.

Excited State 2: Singlet-A 4.7138 ev 263.02 nm f=0.0280 <S\*\*2>=0.000  
 112 -> 116 -0.12851  
 112 -> 121 -0.11189  
 113 -> 115 0.49343  
 113 -> 117 -0.13983  
 114 -> 116 -0.39032

Excited State 3: Singlet-A 4.7638 ev 260.26 nm f=0.0431 <S\*\*2>=0.000  
 111 -> 116 0.11366  
 111 -> 121 0.14911  
 112 -> 115 0.47669  
 112 -> 117 -0.14570  
 113 -> 116 -0.31530  
 114 -> 117 -0.24636  
 114 -> 122 0.11315

#### 4c

114 HOMO, 115 LUMO

Excited State 1: Singlet-A 3.6857 ev 336.40 nm f=1.3609 <S\*\*2>=0.000  
 110 -> 115 -0.11926  
 112 -> 115 -0.11490  
 113 -> 116 -0.10371  
 114 -> 115 0.65979

This state for optimization and/or second-order correction.

Total Energy, E(CIS/TDA) = -1524.17658990

Copying the excited state density for this state as the 1-particle RhoCI density.

Excited State 2: Singlet-A 4.4779 ev 276.88 nm f=0.0227 <S\*\*2>=0.000  
 113 -> 115 0.55153

|                  |           |           |           |          |              |
|------------------|-----------|-----------|-----------|----------|--------------|
| 113 -> 118       | -0.12259  |           |           |          |              |
| 114 -> 116       | -0.36084  |           |           |          |              |
| Excited State 3: | Singlet-A | 4.5964 eV | 269.74 nm | f=0.0219 | <S**2>=0.000 |
| 111 -> 127       | 0.12685   |           |           |          |              |
| 112 -> 115       | 0.48297   |           |           |          |              |
| 113 -> 116       | -0.34185  |           |           |          |              |
| 114 -> 118       | -0.27987  |           |           |          |              |

#### S7.4. TDA-M06-2X: Excitation energies and oscillator strengths of the first excited states

##### 3a keto-enol

87 HOMO, 88 LUMO

|                  |           |           |           |          |              |
|------------------|-----------|-----------|-----------|----------|--------------|
| Excited State 1: | Singlet-A | 3.9629 eV | 312.86 nm | f=1.1661 | <S**2>=0.000 |
| 87 -> 88         | 0.67537   |           |           |          |              |

This state for optimization and/or second-order correction.  
Total Energy, E(CIS/TDA) = -1070.86805747  
Copying the excited state density for this state as the 1-particle RhoCI density.

|                  |           |           |           |          |              |
|------------------|-----------|-----------|-----------|----------|--------------|
| Excited State 2: | Singlet-A | 4.3550 eV | 284.70 nm | f=0.0001 | <S**2>=0.000 |
| 82 -> 88         | 0.63773   |           |           |          |              |
| 82 -> 90         | -0.12554  |           |           |          |              |
| 82 -> 92         | 0.16984   |           |           |          |              |
| 82 -> 102        | -0.11073  |           |           |          |              |

|                  |           |           |           |          |              |
|------------------|-----------|-----------|-----------|----------|--------------|
| Excited State 3: | Singlet-A | 4.7764 eV | 259.57 nm | f=0.1360 | <S**2>=0.000 |
| 84 -> 88         | 0.17203   |           |           |          |              |
| 86 -> 88         | 0.27093   |           |           |          |              |
| 86 -> 92         | -0.12580  |           |           |          |              |
| 87 -> 90         | 0.56117   |           |           |          |              |
| 87 -> 92         | -0.12231  |           |           |          |              |

|                  |           |           |           |          |              |
|------------------|-----------|-----------|-----------|----------|--------------|
| Excited State 4: | Singlet-A | 4.8098 eV | 257.78 nm | f=0.0031 | <S**2>=0.000 |
| 86 -> 91         | -0.10399  |           |           |          |              |
| 87 -> 89         | 0.64902   |           |           |          |              |
| 87 -> 93         | 0.17301   |           |           |          |              |

##### 3a cis-diketo

87 HOMO, 88 LUMO

|                  |           |           |           |          |              |
|------------------|-----------|-----------|-----------|----------|--------------|
| Excited State 1: | Singlet-A | 4.0458 eV | 306.45 nm | f=0.0169 | <S**2>=0.000 |
| 82 -> 89         | -0.22005  |           |           |          |              |
| 82 -> 93         | -0.11152  |           |           |          |              |
| 82 -> 95         | 0.16970   |           |           |          |              |
| 83 -> 88         | 0.55502   |           |           |          |              |
| 83 -> 92         | -0.18225  |           |           |          |              |
| 87 -> 88         | 0.10803   |           |           |          |              |

This state for optimization and/or second-order correction.  
Total Energy, E(CIS/TDA) = -1070.86858006  
Copying the excited state density for this state as the 1-particle RhoCI density.

|                  |           |           |           |          |              |
|------------------|-----------|-----------|-----------|----------|--------------|
| Excited State 2: | Singlet-A | 4.2341 eV | 292.82 nm | f=0.0026 | <S**2>=0.000 |
| 82 -> 88         | 0.44624   |           |           |          |              |
| 82 -> 92         | -0.15527  |           |           |          |              |
| 83 -> 89         | -0.33538  |           |           |          |              |
| 83 -> 93         | -0.15883  |           |           |          |              |
| 83 -> 95         | 0.23885   |           |           |          |              |

|                  |           |           |           |          |              |
|------------------|-----------|-----------|-----------|----------|--------------|
| Excited State 3: | Singlet-A | 4.7160 eV | 262.90 nm | f=0.4831 | <S**2>=0.000 |
| 86 -> 89         | 0.15947   |           |           |          |              |
| 87 -> 88         | 0.64319   |           |           |          |              |

|                  |           |           |           |          |              |
|------------------|-----------|-----------|-----------|----------|--------------|
| Excited State 4: | Singlet-A | 4.7554 eV | 260.73 nm | f=0.0523 | <S**2>=0.000 |
| 86 -> 88         | 0.63397   |           |           |          |              |
| 87 -> 89         | 0.19995   |           |           |          |              |

|                  |           |           |           |          |              |
|------------------|-----------|-----------|-----------|----------|--------------|
| Excited State 5: | Singlet-A | 5.0235 eV | 246.81 nm | f=0.0455 | <S**2>=0.000 |
| 84 -> 89         | -0.31351  |           |           |          |              |
| 85 -> 88         | 0.45831   |           |           |          |              |
| 85 -> 92         | 0.11502   |           |           |          |              |

|           |          |
|-----------|----------|
| 86 -> 89  | 0.15245  |
| 86 -> 95  | 0.13755  |
| 86 -> 101 | 0.10200  |
| 87 -> 92  | 0.24128  |
| 87 -> 102 | -0.12257 |

### 3a trans-diketo

87 HOMO, 88 LUMO

Excited State 1: Singlet-A 4.0458 eV 306.45 nm f=0.0169 <S\*\*2>=0.000  
 82 -> 89 -0.22008  
 82 -> 93 0.11158  
 82 -> 95 -0.16965  
 83 -> 88 0.55501  
 83 -> 92 -0.18222  
 87 -> 88 0.10816

This state for optimization and/or second-order correction.

Total Energy, E(CIS/TDA) = -1070.86857954

Copying the excited state density for this state as the 1-particle RhoCI density.

Excited State 2: Singlet-A 4.2341 eV 292.82 nm f=0.0026 <S\*\*2>=0.000  
 82 -> 88 0.44625  
 82 -> 92 -0.15526  
 83 -> 89 -0.33542  
 83 -> 93 0.15893  
 83 -> 95 -0.23877

Excited State 3: Singlet-A 4.7160 eV 262.90 nm f=0.4829 <S\*\*2>=0.000  
 86 -> 89 0.15943  
 87 -> 88 0.64318

### 4a

98 HOMO, 99 LUMO

Excited State 1: Singlet-A 3.6760 eV 337.28 nm f=1.2909 <S\*\*2>=0.000  
 94 -> 99 -0.10776  
 98 -> 99 0.67919

This state for optimization and/or second-order correction.

Total Energy, E(CIS/TDA) = -1295.05039901

Copying the excited state density for this state as the 1-particle RhoCI density.

Excited State 2: Singlet-A 4.6698 eV 265.50 nm f=0.1373 <S\*\*2>=0.000  
 97 -> 99 0.63999  
 98 -> 101 -0.19149

Excited State 3: Singlet-A 4.7548 eV 260.76 nm f=0.0014 <S\*\*2>=0.000  
 95 -> 99 0.49836  
 96 -> 101 0.15667  
 97 -> 99 -0.13493  
 97 -> 103 -0.16909  
 98 -> 100 0.12466  
 98 -> 101 -0.35686

### 4b

114 HOMO, 115 LUMO

Excited State 1: Singlet-A 3.6835 eV 336.60 nm f=1.3679 <S\*\*2>=0.000  
 110 -> 115 -0.10316  
 114 -> 115 0.67952

This state for optimization and/or second-order correction.

Total Energy, E(CIS/TDA) = -2214.25683363

Copying the excited state density for this state as the 1-particle RhoCI density.

Excited State 2: Singlet-A 4.5870 eV 270.29 nm f=0.0163 <S\*\*2>=0.000  
 111 -> 115 -0.10000  
 113 -> 115 0.58309  
 114 -> 116 -0.32225

Excited State 3: Singlet-A 4.6655 eV 265.75 nm f=0.0148 <S\*\*2>=0.000  
 111 -> 123 0.10704  
 112 -> 115 0.58978  
 113 -> 116 -0.23552

114 -> 118 -0.21862

#### 4c

114 HOMO, 115 LUMO

Excited State 1: Singlet-A 3.5958 eV 344.81 nm f=1.3811 <S\*\*2>=0.000  
114 -> 115 0.67700

This state for optimization and/or second-order correction.

Total Energy, E(CIS/TDA) = -1524.09980894

Copying the excited state density for this state as the 1-particle RhoCI density.

Excited State 2: Singlet-A 4.3489 eV 285.09 nm f=0.0134 <S\*\*2>=0.000  
113 -> 115 0.63020  
114 -> 116 0.10965  
114 -> 117 -0.24573

Excited State 3: Singlet-A 4.5163 eV 274.53 nm f=0.0004 <S\*\*2>=0.000  
112 -> 115 0.59954  
113 -> 117 -0.22164  
114 -> 119 -0.21858

### S7.5. TDA-CAM-B3LYP-D3: Excitation energies and oscillator strengths of the first excited states

#### 3a keto-enol

87 HOMO, 88 LUMO

Excited State 1: Singlet-A 3.9641 eV 312.77 nm f=1.1325 <S\*\*2>=0.000  
83 -> 88 0.10074  
87 -> 88 0.67289

This state for optimization and/or second-order correction.

Total Energy, E(CIS/TDA) = -1070.79296311

Copying the excited state density for this state as the 1-particle RhoCI density.

Excited State 2: Singlet-A 4.4009 eV 281.72 nm f=0.0001 <S\*\*2>=0.000  
82 -> 88 0.65290  
82 -> 89 0.12235  
82 -> 92 0.16258

Excited State 3: Singlet-A 4.7644 eV 260.23 nm f=0.1473 <S\*\*2>=0.000  
84 -> 88 -0.15899  
84 -> 96 0.10652  
86 -> 88 -0.28953  
86 -> 92 0.13893  
87 -> 89 0.55348  
87 -> 92 0.10465

#### 3a cis-diketo

87 HOMO, 88 LUMO

Excited State 1: Singlet-A 4.1779 eV 296.76 nm f=0.0017 <S\*\*2>=0.000  
82 -> 88 0.46503  
82 -> 91 0.25389  
83 -> 88 0.34916  
83 -> 89 -0.11163  
83 -> 91 0.18547

This state for optimization and/or second-order correction.

Total Energy, E(CIS/TDA) = -1070.77942857

Copying the excited state density for this state as the 1-particle RhoCI density.

Excited State 2: Singlet-A 4.2617 eV 290.92 nm f=0.0006 <S\*\*2>=0.000  
82 -> 89 -0.22593  
82 -> 94 0.12422  
83 -> 88 0.11363  
83 -> 89 0.52285  
83 -> 90 -0.12195  
83 -> 94 -0.28656

Excited State 3: Singlet-A 4.8528 eV 255.49 nm f=0.1571 <S\*\*2>=0.000  
86 -> 88 0.30873  
87 -> 88 0.34030

87 -> 89 0.46278

Excited State 4: Singlet-A 4.9498 eV 250.48 nm f=0.3211 <S\*\*2>=0.000

84 -> 91 0.11146  
84 -> 97 -0.10318  
86 -> 88 0.56810  
87 -> 88 -0.20175  
87 -> 89 -0.22410

Excited State 5: Singlet-A 4.9925 eV 248.34 nm f=0.0225 <S\*\*2>=0.000

84 -> 88 0.10528  
85 -> 88 0.12322  
85 -> 89 0.43328  
85 -> 90 -0.10180  
85 -> 94 0.14229  
87 -> 88 0.19197  
87 -> 89 -0.20233  
87 -> 94 0.26624  
87 -> 99 -0.12783  
87 -> 100 0.11226  
87 -> 101 -0.11527

### 3a trans-diketo

87 HOMO, 88 LUMO

Excited State 1: Singlet-A 4.1349 eV 299.85 nm f=0.0212 <S\*\*2>=0.000

82 -> 89 -0.22255  
82 -> 93 0.17606  
83 -> 88 0.58699  
83 -> 92 -0.16496  
87 -> 88 0.11999

This state for optimization and/or second-order correction.

Total Energy, E(CIS/TDA) = -1070.79082359

Copying the excited state density for this state as the 1-particle RhoCI density.

Excited State 2: Singlet-A 4.3668 eV 283.93 nm f=0.0033 <S\*\*2>=0.000

82 -> 88 0.47661  
82 -> 92 -0.14440  
83 -> 89 -0.36777  
83 -> 93 0.25877

Excited State 3: Singlet-A 4.7218 eV 262.58 nm f=0.4670 <S\*\*2>=0.000

86 -> 89 0.18284  
87 -> 88 0.63279

Excited State 4: Singlet-A 4.7505 eV 260.99 nm f=0.0496 <S\*\*2>=0.000

84 -> 92 0.10658  
86 -> 88 0.61653  
87 -> 89 0.22490

Excited State 5: Singlet-A 4.9806 eV 248.93 nm f=0.0510 <S\*\*2>=0.000

84 -> 89 0.32872  
85 -> 88 0.45321  
85 -> 92 0.11557  
86 -> 89 -0.13535  
86 -> 93 -0.16968  
86 -> 97 0.11895  
87 -> 92 -0.23559  
87 -> 98 -0.12718

### 4a

98 HOMO, 99 LUMO

Excited State 1: Singlet-A 3.7065 eV 334.51 nm f=1.2530 <S\*\*2>=0.000

94 -> 99 0.11252  
98 -> 99 0.67648

This state for optimization and/or second-order correction.

Total Energy, E(CIS/TDA) = -1294.98467519

Copying the excited state density for this state as the 1-particle RhoCI density.

Excited State 2: Singlet-A 4.6928 eV 264.20 nm f=0.1657 <S\*\*2>=0.000

97 -> 99 0.60405  
98 -> 100 -0.28870



Excited State 3: Singlet-A 4.7604 eV 260.45 nm f=0.0001 <S\*\*2>=0.000  
 95 -> 99 0.50282  
 96 -> 100 0.19871  
 97 -> 99 0.15992  
 97 -> 103 0.18332  
 98 -> 100 0.31898  
 98 -> 107 0.12002

#### 4b

114 HOMO, 115 LUMO

Excited State 1: Singlet-A 3.7156 eV 333.68 nm f=1.3283 <S\*\*2>=0.000  
 110 -> 115 0.10701  
 114 -> 115 0.67646  
 This state for optimization and/or second-order correction.  
 Total Energy, E(CIS/TDA) = -2214.24613977  
 Copying the excited state density for this state as the 1-particle RhoCI density.

Excited State 2: Singlet-A 4.6102 eV 268.93 nm f=0.0163 <S\*\*2>=0.000  
 111 -> 115 -0.13431  
 112 -> 116 -0.10384  
 113 -> 115 0.53778  
 114 -> 116 0.35674

Excited State 3: Singlet-A 4.6716 eV 265.40 nm f=0.0274 <S\*\*2>=0.000  
 111 -> 121 0.12260  
 112 -> 115 0.55712  
 113 -> 116 -0.26800  
 114 -> 118 0.22231

Excited State 4: Singlet-A 4.7522 eV 260.90 nm f=0.0776 <S\*\*2>=0.000  
 111 -> 115 0.52307  
 112 -> 116 0.23946  
 113 -> 115 0.22574  
 113 -> 118 0.21945  
 114 -> 121 0.16116

Excited State 5: Singlet-A 5.0066 eV 247.64 nm f=0.1107 <S\*\*2>=0.000  
 111 -> 118 -0.10566  
 112 -> 116 0.12742  
 113 -> 115 -0.35434  
 114 -> 116 0.54050

#### 4c

114 HOMO, 115 LUMO

Excited State 1: Singlet-A 3.6268 eV 341.85 nm f=1.3519 <S\*\*2>=0.000  
 110 -> 115 0.10187  
 114 -> 115 0.67085  
 This state for optimization and/or second-order correction.  
 Total Energy, E(CIS/TDA) = -1524.04043612  
 Copying the excited state density for this state as the 1-particle RhoCI density.

Excited State 2: Singlet-A 4.3615 eV 284.27 nm f=0.0132 <S\*\*2>=0.000  
 113 -> 115 0.60504  
 114 -> 116 0.30459

Excited State 3: Singlet-A 4.5069 eV 275.10 nm f=0.0046 <S\*\*2>=0.000  
 111 -> 129 0.10380  
 112 -> 115 0.56684  
 113 -> 116 -0.28012  
 114 -> 119 -0.22848

Excited State 4: Singlet-A 4.6826 eV 264.78 nm f=0.0067 <S\*\*2>=0.000  
 111 -> 115 0.40546  
 112 -> 116 0.20431  
 113 -> 115 0.24377  
 113 -> 119 -0.30455  
 114 -> 116 -0.27631  
 114 -> 129 0.12609

Excited State 5: Singlet-A 4.8875 eV 253.68 nm f=0.2098 <S\*\*2>=0.000

|            |          |
|------------|----------|
| 111 -> 115 | 0.30616  |
| 112 -> 116 | 0.25966  |
| 113 -> 115 | -0.21638 |
| 114 -> 116 | 0.48503  |

### S7.3. TD-@B97X-D: Excitation energies and oscillator strengths of the first excited states

#### 3a keto-enol

87 HOMO, 88 LUMO

Excited State 1: Singlet-A 3.9016 eV 317.78 nm f=0.9123 <S\*\*2>=0.000  
 83 -> 88 0.13946  
 86 -> 89 -0.10641  
 87 -> 88 0.66706

This state for optimization and/or second-order correction.

Total Energy, E(TD-HF/TD-DFT) = -1070.93750704

Copying the excited state density for this state as the 1-particle RhoCI density.

Excited State 2: Singlet-A 4.3362 eV 285.93 nm f=0.0006 <S\*\*2>=0.000  
 82 -> 88 0.64507  
 82 -> 89 0.11498  
 82 -> 91 0.15750  
 83 -> 88 0.10138

Excited State 3: Singlet-A 4.6779 eV 265.04 nm f=0.1734 <S\*\*2>=0.000  
 86 -> 88 -0.41743  
 86 -> 91 0.14807  
 87 -> 89 0.50054

Excited State 4: Singlet-A 4.8843 eV 253.84 nm f=0.0122 <S\*\*2>=0.000  
 84 -> 88 -0.29301  
 84 -> 89 0.24499  
 84 -> 91 0.14525  
 85 -> 88 0.15980  
 86 -> 88 0.17677  
 86 -> 89 0.26976  
 86 -> 96 -0.11071  
 87 -> 91 0.33302  
 87 -> 96 -0.12250

Excited State 5: Singlet-A 4.9032 eV 252.87 nm f=0.0087 <S\*\*2>=0.000  
 84 -> 88 0.13896  
 84 -> 89 -0.10884  
 85 -> 88 0.32141  
 85 -> 89 0.31754  
 85 -> 91 -0.18387  
 86 -> 88 -0.23053  
 86 -> 91 -0.23172  
 86 -> 97 -0.16957  
 87 -> 89 -0.12062  
 87 -> 96 0.12134  
 87 -> 97 0.13343

#### 3a cis-diketo

87 HOMO, 88 LUMO

Excited State 1: Singlet-A 4.1346 eV 299.87 nm f=0.0020 <S\*\*2>=0.000  
 82 -> 88 0.46341  
 82 -> 89 -0.10278  
 82 -> 91 -0.25212  
 83 -> 88 -0.35098  
 83 -> 89 0.11241  
 83 -> 91 0.18863

This state for optimization and/or second-order correction.

Total Energy, E(TD-HF/TD-DFT) = -1070.92660669

Copying the excited state density for this state as the 1-particle RhoCI density.

Excited State 2: Singlet-A 4.2242 eV 293.51 nm f=0.0006 <S\*\*2>=0.000  
 82 -> 89 0.23480  
 82 -> 93 0.12407  
 83 -> 88 0.12462  
 83 -> 89 0.53109

|                  |           |           |           |          |              |  |
|------------------|-----------|-----------|-----------|----------|--------------|--|
| 83 -> 93         | 0.28142   |           |           |          |              |  |
| Excited State 3: | Singlet-A | 4.7166 ev | 262.87 nm | f=0.1403 | <S**2>=0.000 |  |
| 86 -> 88         | 0.35015   |           |           |          |              |  |
| 87 -> 88         | 0.22517   |           |           |          |              |  |
| 87 -> 89         | 0.52687   |           |           |          |              |  |
| Excited State 4: | Singlet-A | 4.8000 ev | 258.30 nm | f=0.2824 | <S**2>=0.000 |  |
| 86 -> 88         | 0.56583   |           |           |          |              |  |
| 87 -> 88         | -0.10361  |           |           |          |              |  |
| 87 -> 89         | -0.33578  |           |           |          |              |  |
| Excited State 5: | Singlet-A | 4.9327 ev | 251.35 nm | f=0.0341 | <S**2>=0.000 |  |
| 84 -> 88         | 0.19235   |           |           |          |              |  |
| 85 -> 88         | 0.15281   |           |           |          |              |  |
| 85 -> 89         | 0.47810   |           |           |          |              |  |
| 85 -> 93         | -0.16407  |           |           |          |              |  |
| 86 -> 91         | 0.10137   |           |           |          |              |  |
| 87 -> 93         | -0.27254  |           |           |          |              |  |
| 87 -> 98         | 0.18316   |           |           |          |              |  |

### 3a trans-diketo

87 HOMO, 88 LUMO

Excitation energies and oscillator strengths:

|                  |           |           |           |          |              |
|------------------|-----------|-----------|-----------|----------|--------------|
| Excited State 1: | Singlet-A | 4.1012 ev | 302.31 nm | f=0.0189 | <S**2>=0.000 |
| 82 -> 89         | 0.22287   |           |           |          |              |
| 82 -> 93         | -0.17807  |           |           |          |              |
| 83 -> 88         | 0.59010   |           |           |          |              |
| 83 -> 90         | -0.16479  |           |           |          |              |
| 87 -> 88         | 0.11583   |           |           |          |              |

This state for optimization and/or second-order correction.

Total Energy, E(TD-HF/TD-DFT) = -1070.93725221

Copying the excited state density for this state as the 1-particle RhoCI density.

|                  |           |           |           |          |              |
|------------------|-----------|-----------|-----------|----------|--------------|
| Excited State 2: | Singlet-A | 4.3316 ev | 286.23 nm | f=0.0027 | <S**2>=0.000 |
| 82 -> 88         | 0.47829   |           |           |          |              |
| 82 -> 90         | -0.14284  |           |           |          |              |
| 83 -> 89         | 0.37109   |           |           |          |              |
| 83 -> 93         | -0.26471  |           |           |          |              |

|                  |           |           |           |          |              |
|------------------|-----------|-----------|-----------|----------|--------------|
| Excited State 3: | Singlet-A | 4.6346 ev | 267.52 nm | f=0.4189 | <S**2>=0.000 |
| 86 -> 89         | 0.29562   |           |           |          |              |
| 87 -> 88         | 0.59945   |           |           |          |              |

|                  |           |           |           |          |              |
|------------------|-----------|-----------|-----------|----------|--------------|
| Excited State 4: | Singlet-A | 4.6373 ev | 267.36 nm | f=0.0414 | <S**2>=0.000 |
| 86 -> 88         | 0.58281   |           |           |          |              |
| 87 -> 89         | 0.32970   |           |           |          |              |

|                  |           |           |           |          |              |
|------------------|-----------|-----------|-----------|----------|--------------|
| Excited State 5: | Singlet-A | 4.9272 ev | 251.63 nm | f=0.0439 | <S**2>=0.000 |
| 84 -> 89         | 0.36085   |           |           |          |              |
| 85 -> 88         | 0.41951   |           |           |          |              |
| 85 -> 90         | 0.16037   |           |           |          |              |
| 86 -> 89         | 0.10856   |           |           |          |              |
| 86 -> 93         | 0.18138   |           |           |          |              |
| 86 -> 97         | -0.12495  |           |           |          |              |
| 87 -> 90         | 0.23506   |           |           |          |              |
| 87 -> 98         | -0.11822  |           |           |          |              |

### 4a

98 HOMO, 99 LUMO

Excitation energies and oscillator strengths:

|                  |           |           |           |          |              |
|------------------|-----------|-----------|-----------|----------|--------------|
| Excited State 1: | Singlet-A | 3.6254 ev | 341.98 nm | f=1.0097 | <S**2>=0.000 |
| 94 -> 99         | -0.15585  |           |           |          |              |
| 98 -> 99         | 0.67085   |           |           |          |              |

This state for optimization and/or second-order correction.

Total Energy, E(TD-HF/TD-DFT) = -1295.11496532

Copying the excited state density for this state as the 1-particle RhoCI density.

|                  |           |           |           |          |              |
|------------------|-----------|-----------|-----------|----------|--------------|
| Excited State 2: | Singlet-A | 4.5762 ev | 270.94 nm | f=0.1701 | <S**2>=0.000 |
|------------------|-----------|-----------|-----------|----------|--------------|

|                  |           |           |           |          |              |  |
|------------------|-----------|-----------|-----------|----------|--------------|--|
| 97 -> 99         | 0.56293   |           |           |          |              |  |
| 98 -> 100        | -0.36801  |           |           |          |              |  |
| Excited State 3: | Singlet-A | 4.7832 ev | 259.21 nm | f=0.0003 | <S**2>=0.000 |  |
| 95 -> 99         | 0.47658   |           |           |          |              |  |
| 95 -> 102        | -0.11702  |           |           |          |              |  |
| 96 -> 100        | 0.27009   |           |           |          |              |  |
| 97 -> 99         | -0.14143  |           |           |          |              |  |
| 97 -> 102        | -0.21204  |           |           |          |              |  |
| 98 -> 100        | -0.25790  |           |           |          |              |  |
| 98 -> 106        | -0.14636  |           |           |          |              |  |
| Excited State 4: | Singlet-A | 4.8025 ev | 258.17 nm | f=0.0648 | <S**2>=0.000 |  |
| 95 -> 100        | 0.28352   |           |           |          |              |  |
| 96 -> 99         | 0.50349   |           |           |          |              |  |
| 96 -> 102        | -0.14362  |           |           |          |              |  |
| 97 -> 100        | 0.17187   |           |           |          |              |  |
| 97 -> 106        | 0.13438   |           |           |          |              |  |
| 98 -> 102        | 0.23073   |           |           |          |              |  |
| 98 -> 108        | 0.10280   |           |           |          |              |  |
| Excited State 5: | Singlet-A | 5.0807 ev | 244.03 nm | f=0.1051 | <S**2>=0.000 |  |
| 94 -> 99         | 0.45014   |           |           |          |              |  |
| 95 -> 100        | 0.18933   |           |           |          |              |  |
| 96 -> 102        | -0.18454  |           |           |          |              |  |
| 97 -> 100        | -0.29876  |           |           |          |              |  |
| 98 -> 102        | -0.27431  |           |           |          |              |  |
| 98 -> 108        | 0.11797   |           |           |          |              |  |

#### 4b

114 HOMO, 115 LUMO

Excitation energies and oscillator strengths:

|                  |           |           |           |          |              |
|------------------|-----------|-----------|-----------|----------|--------------|
| Excited State 1: | Singlet-A | 3.6388 ev | 340.73 nm | f=1.0796 | <S**2>=0.000 |
| 110 -> 115       | -0.14825  |           |           |          |              |
| 114 -> 115       | 0.66936   |           |           |          |              |

This state for optimization and/or second-order correction.

Total Energy, E(TD-HF/TD-DFT) = -2214.33618114

Copying the excited state density for this state as the 1-particle RhoCI density.

|                  |           |           |           |          |              |
|------------------|-----------|-----------|-----------|----------|--------------|
| Excited State 2: | Singlet-A | 4.5644 ev | 271.63 nm | f=0.0748 | <S**2>=0.000 |
| 111 -> 115       | 0.13026   |           |           |          |              |
| 111 -> 117       | -0.10265  |           |           |          |              |
| 112 -> 121       | -0.10000  |           |           |          |              |
| 113 -> 115       | 0.49870   |           |           |          |              |
| 114 -> 116       | -0.41782  |           |           |          |              |

|                  |           |           |           |          |              |
|------------------|-----------|-----------|-----------|----------|--------------|
| Excited State 3: | Singlet-A | 4.6708 ev | 265.45 nm | f=0.0575 | <S**2>=0.000 |
| 111 -> 116       | 0.11549   |           |           |          |              |
| 111 -> 121       | 0.13595   |           |           |          |              |
| 112 -> 115       | 0.47184   |           |           |          |              |
| 112 -> 117       | -0.16465  |           |           |          |              |
| 113 -> 116       | -0.33965  |           |           |          |              |
| 114 -> 117       | -0.24691  |           |           |          |              |

|                  |           |           |           |          |              |
|------------------|-----------|-----------|-----------|----------|--------------|
| Excited State 4: | Singlet-A | 4.7037 ev | 263.59 nm | f=0.0509 | <S**2>=0.000 |
| 111 -> 115       | 0.49841   |           |           |          |              |
| 112 -> 116       | 0.31817   |           |           |          |              |
| 113 -> 117       | 0.26383   |           |           |          |              |
| 114 -> 121       | -0.17568  |           |           |          |              |

|                  |           |           |           |          |              |
|------------------|-----------|-----------|-----------|----------|--------------|
| Excited State 5: | Singlet-A | 5.0308 ev | 246.45 nm | f=0.0829 | <S**2>=0.000 |
| 110 -> 115       | 0.36462   |           |           |          |              |
| 111 -> 116       | -0.32967  |           |           |          |              |
| 112 -> 115       | 0.18564   |           |           |          |              |
| 112 -> 117       | 0.31604   |           |           |          |              |
| 113 -> 121       | -0.18041  |           |           |          |              |
| 114 -> 117       | -0.16958  |           |           |          |              |
| 114 -> 122       | -0.15799  |           |           |          |              |

#### 4c

114 HOMO, 115 LUMO

Excitation energies and oscillator strengths:

Excited State 1: Singlet-A 3.5655 eV 347.73 nm f=1.1315 <S\*\*2>=0.000  
 110 -> 115 -0.13902  
 112 -> 115 -0.14567  
 113 -> 116 -0.10200  
 114 -> 115 0.65508

This state for optimization and/or second-order correction.

Total Energy, E(TD-HF/TD-DFT) = -1524.18100447

Copying the excited state density for this state as the 1-particle RhoCI density.

Excited State 2: Singlet-A 4.3391 eV 285.74 nm f=0.0336 <S\*\*2>=0.000  
 113 -> 115 0.52757  
 113 -> 118 -0.15175  
 114 -> 116 -0.39917

Excited State 3: Singlet-A 4.4691 eV 277.42 nm f=0.0391 <S\*\*2>=0.000  
 111 -> 127 0.10889  
 112 -> 115 0.45614  
 112 -> 118 -0.12401  
 113 -> 116 -0.37477  
 114 -> 118 -0.29415

Excited State 4: Singlet-A 4.6275 eV 267.93 nm f=0.0395 <S\*\*2>=0.000  
 111 -> 115 0.43794  
 112 -> 116 0.30124  
 113 -> 115 0.17670  
 113 -> 118 0.32155  
 114 -> 124 0.13538  
 114 -> 127 -0.13597

Excited State 5: Singlet-A 4.8964 eV 253.21 nm f=0.1641 <S\*\*2>=0.000  
 111 -> 115 -0.22738  
 111 -> 118 0.10715  
 112 -> 116 -0.20511  
 112 -> 124 0.11024  
 113 -> 115 0.38124  
 113 -> 118 0.17603  
 114 -> 116 0.43332

## S8. Supplementary electronic-state transition spectroscopy data

**Table S2.** Fluorescence decay times,  $\tau_i$ , and relative amplitudes,  $f_i$ , of compounds **3a**, **3b**, and **3c**, as retrieved from fitting the experimental decay patterns measured upon excitation at 280 nm to a biexponential decay model function. The reported values are averaged over three parallels. The pertaining errors are the corresponding standard deviations.

| Compound  | Solvent            | $\tau_1$ (ps) | $f_1$           | $\tau_2$ (ps) | $f_2$           |
|-----------|--------------------|---------------|-----------------|---------------|-----------------|
| <b>3a</b> | ethyl acetate      | -             | 0               | 2072 $\pm$ 11 | 1               |
|           | dichloromethane    | 222 $\pm$ 1   | 0.93 $\pm$ 0.01 | 2248 $\pm$ 4  | 0.07 $\pm$ 0.01 |
|           | acetonitrile       | 209 $\pm$ 1   | 0.97 $\pm$ 0.01 | 2368 $\pm$ 24 | 0.03 $\pm$ 0.01 |
|           | dimethylformamide  | 249 $\pm$ 1   | 0.58 $\pm$ 0.01 | 2163 $\pm$ 1  | 0.42 $\pm$ 0.01 |
|           | dimethyl sulfoxide | 258 $\pm$ 1   | 0.94 $\pm$ 0.01 | 2188 $\pm$ 24 | 0.06 $\pm$ 0.01 |
|           | butanol            | 431 $\pm$ 1   | 0.98 $\pm$ 0.01 | 2653 $\pm$ 1  | 0.02 $\pm$ 0.01 |
|           | ethanol            | 360 $\pm$ 1   | $\cong$ 1       | $\cong$ 3660  | <0.01           |
|           | methanol           | 388 $\pm$ 2   | 0.97 $\pm$ 0.01 | 2434 $\pm$ 21 | 0.03 $\pm$ 0.01 |
| <b>3b</b> | ethyl acetate      | 202 $\pm$ 2   | 0.95 $\pm$ 0.01 | 1940 $\pm$ 8  | 0.05 $\pm$ 0.01 |
|           | dichloromethane    | 262 $\pm$ 3   | 0.97 $\pm$ 0.01 | 2057 $\pm$ 13 | 0.03 $\pm$ 0.01 |
|           | acetonitrile       | 205 $\pm$ 2   | 0.96 $\pm$ 0.01 | 2207 $\pm$ 29 | 0.04 $\pm$ 0.01 |
|           | dimethylformamide  | 257 $\pm$ 2   | 0.91 $\pm$ 0.01 | 2933 $\pm$ 1  | 0.09 $\pm$ 0.01 |
|           | dimethyl sulfoxide | 271 $\pm$ 1   | 0.96 $\pm$ 0.01 | 2471 $\pm$ 5  | 0.04 $\pm$ 0.01 |
|           | butanol            | 451 $\pm$ 4   | 0.75 $\pm$ 0.01 | 4011 $\pm$ 20 | 0.25 $\pm$ 0.01 |
|           | ethanol            | 281 $\pm$ 2   | 0.99 $\pm$ 0.01 | 2612 $\pm$ 71 | 0.01 $\pm$ 0.01 |
|           | methanol           | 275 $\pm$ 1   | 0.89 $\pm$ 0.01 | 2460 $\pm$ 14 | 0.11 $\pm$ 0.01 |
| <b>3c</b> | ethyl acetate      | 309 $\pm$ 2   | 0.89 $\pm$ 0.03 | 1669 $\pm$ 22 | 0.11 $\pm$ 0.03 |
|           | dichloromethane    | 735 $\pm$ 52  | 0.30 $\pm$ 0.01 | 1602 $\pm$ 17 | 0.70 $\pm$ 0.01 |
|           | acetonitrile       | 501 $\pm$ 15  | 0.30 $\pm$ 0.01 | 1863 $\pm$ 9  | 0.70 $\pm$ 0.01 |
|           | dimethylformamide  | 362 $\pm$ 5   | 0.76 $\pm$ 0.01 | 2325 $\pm$ 7  | 0.24 $\pm$ 0.01 |
|           | dimethyl sulfoxide | 406 $\pm$ 3   | 0.71 $\pm$ 0.01 | 2232 $\pm$ 4  | 0.29 $\pm$ 0.01 |
|           | butanol            | 730 $\pm$ 6   | 0.37 $\pm$ 0.01 | 2501 $\pm$ 6  | 0.63 $\pm$ 0.01 |
|           | ethanol            | 644 $\pm$ 23  | 0.45 $\pm$ 0.01 | 1590 $\pm$ 12 | 0.55 $\pm$ 0.01 |
|           | methanol           | 545 $\pm$ 1   | 0.98 $\pm$ 0.01 | 2657 $\pm$ 24 | 0.02 $\pm$ 0.01 |

**Table S3.** Fluorescence decay times,  $\tau_i$ , and relative amplitudes,  $f_i$ , of compounds **3a**, **3b**, and **3c**, as retrieved from fitting the experimental decay patterns measured upon excitation at 420 nm to a biexponential decay model function. The reported values are averaged over three parallels. The pertaining errors are the corresponding standard deviations.

| Compound  | Solvent            | $\tau_1$ (ps) | $f_1$       | $\tau_2$ (ps) | $f_2$       | $\tau_3$ (ps) | $f_3$       |
|-----------|--------------------|---------------|-------------|---------------|-------------|---------------|-------------|
| <b>3a</b> | toluene            | -             | 0           | 361 ± 3       | 0.87 ± 0.01 | 2058 ± 5      | 0.13 ± 0.01 |
|           | ethyl acetate      | 30 ± 2        | 0.13 ± 0.01 | -             | 0           | 2059 ± 3      | 0.87 ± 0.01 |
|           | dichloromethane    | 11 ± 4        | 0.28 ± 0.04 | 282 ± 2       | 0.63 ± 0.03 | 2467 ± 1      | 0.09 ± 0.01 |
|           | acetone            | 19 ± 1        | 0.37 ± 0.02 | 277 ± 1       | 0.21 ± 0.01 | 2154 ± 8      | 0.42 ± 0.03 |
|           | acetonitrile       | 16 ± 1        | 0.30 ± 0.03 | 243 ± 2       | 0.63 ± 0.03 | 2454 ± 18     | 0.07 ± 0.01 |
|           | dimethylformamide  | -             | 0           | 273 ± 8       | 0.32 ± 0.01 | 2098 ± 1      | 0.68 ± 0.01 |
|           | dimethyl sulfoxide | -             | 0           | 291 ± 4       | 0.92 ± 0.01 | 2244 ± 9      | 0.08 ± 0.01 |
|           | butanol            | -             | 0           | 405 ± 6       | ≅ 1         | ≅ 3700        | <0.001      |
|           | ethanol            | -             | 0           | 353 ± 10      | ≅ 1         | ≅ 2800        | <0.01       |
|           | methanol           | -             | 0           | 371 ± 6       | 0.96 ± 0.01 | 2224 ± 1      | 0.04 ± 0.01 |
| <b>3b</b> | toluene            | -             | 0           | 412 ± 4       | 0.94 ± 0.01 | 1269 ± 24     | 0.06 ± 0.01 |
|           | ethyl acetate      | 29 ± 2        | 0.35 ± 0.01 | 213 ± 1       | 0.64 ± 0.01 | 2226 ± 7      | 0.01 ± 0.01 |
|           | dichloromethane    | -             | 0           | 320 ± 1       | 0.92 ± 0.01 | 2336 ± 6      | 0.08 ± 0.01 |
|           | acetone            | 53 ± 3        | 0.46 ± 0.01 | 202 ± 3       | 0.53 ± 0.01 | 2010 ± 46     | 0.01 ± 0.01 |
|           | acetonitrile       | 51 ± 1        | 0.61 ± 0.01 | 236 ± 1       | 0.33 ± 0.01 | 2069 ± 2      | 0.06 ± 0.01 |
|           | dimethylformamide  | 75 ± 9        | 0.19 ± 0.03 | 207 ± 4       | 0.77 ± 0.03 | 1345 ± 61     | 0.04 ± 0.01 |
|           | dimethyl sulfoxide | -             | 0           | 247 ± 1       | 0.97 ± 0.01 | 2333 ± 6      | 0.03 ± 0.01 |
|           | butanol            | -             | 0           | 328 ± 2       | 0.97 ± 0.01 | 3198 ± 15     | 0.03 ± 0.01 |
|           | ethanol            | -             | 0           | 252 ± 2       | 0.98 ± 0.01 | 1720 ± 41     | 0.02 ± 0.01 |
|           | methanol           | -             | 0           | 279 ± 2       | 0.90 ± 0.01 | 2031 ± 6      | 0.10 ± 0.01 |
| <b>3c</b> | toluene            | -             | 0           | 416 ± 1       | 0.98 ± 0.01 | 2360 ± 15     | 0.02 ± 0.01 |
|           | ethyl acetate      | 32 ± 1        | 0.39 ± 0.02 | 229 ± 1       | 0.59 ± 0.02 | 2259 ± 17     | 0.02 ± 0.01 |
|           | dichloromethane    | 22 ± 1        | 0.28 ± 0.01 | 371 ± 1       | 0.71 ± 0.01 | ≅ 3700        | <0.01       |
|           | acetone            | 38 ± 1        | 0.51 ± 0.01 | 196 ± 1       | 0.47 ± 0.01 | 1553 ± 37     | 0.02 ± 0.01 |
|           | acetonitrile       | 38 ± 1        | 0.49 ± 0.01 | 225 ± 1       | 0.38 ± 0.01 | 2017 ± 2      | 0.12 ± 0.01 |
|           | dimethylformamide  | -             | 0           | 320 ± 1       | 0.77 ± 0.01 | 2197 ± 2      | 0.23 ± 0.01 |
|           | dimethyl sulfoxide | -             | 0           | 349 ± 1       | 0.98 ± 0.01 | 3117 ± 8      | 0.02 ± 0.01 |
|           | butanol            | -             | 0           | 397 ± 1       | 0.91 ± 0.01 | 1270 ± 5      | 0.09 ± 0.01 |
|           | ethanol            | -             | 0           | 546 ± 2       | 0.92 ± 0.01 | 1716 ± 10     | 0.08 ± 0.01 |
|           | methanol           | -             | 0           | 579 ± 1       | 0.93 ± 0.01 | 1943 ± 15     | 0.07 ± 0.01 |

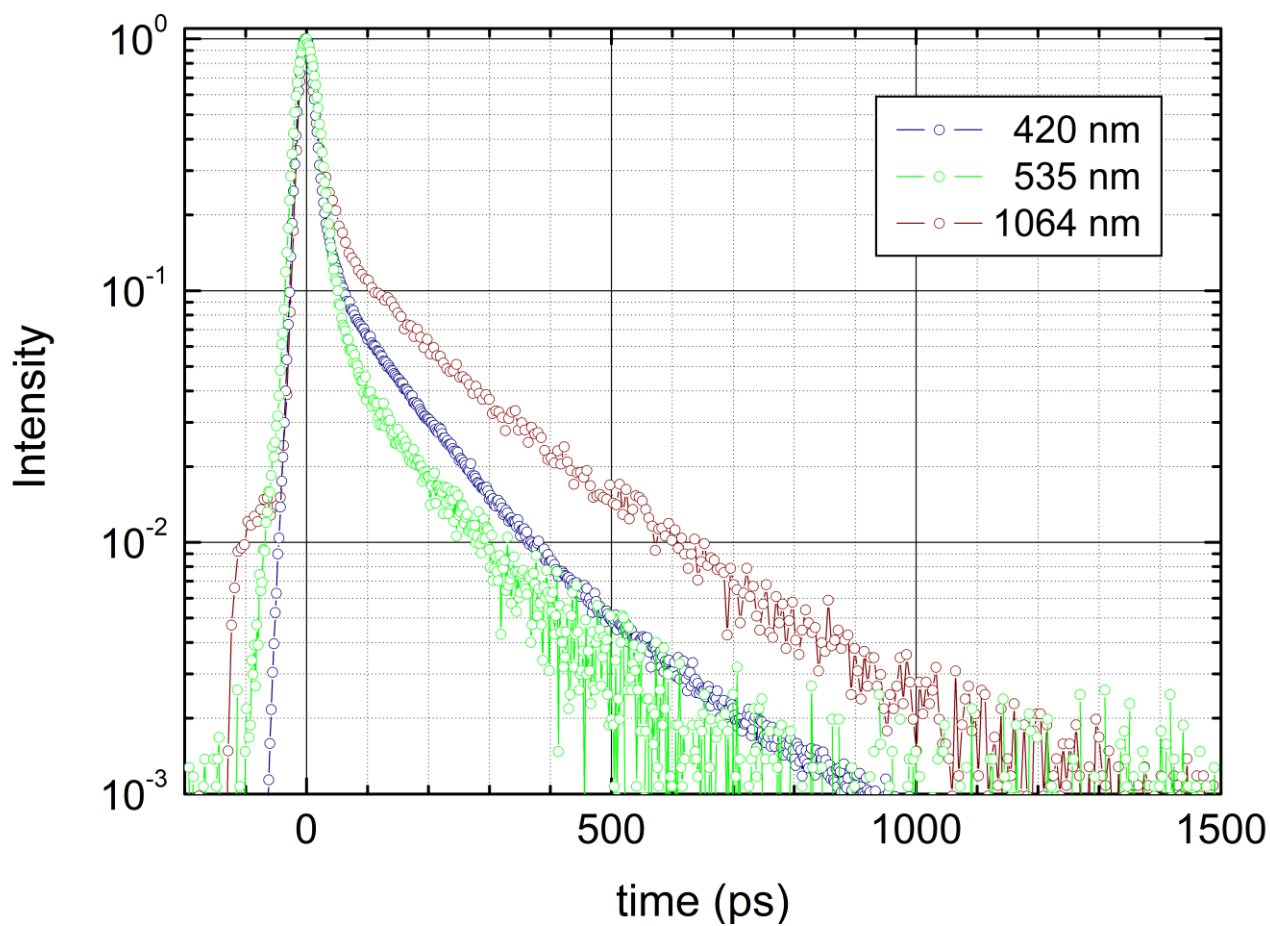

**Figure S9.** The TCSPC apparatus instrumental response to <10 ps laser pulses at 420 nm (violet, laser pulse duration 2.8 ps), 532 nm (green, laser pulse duration 6.4 ps), and 1064 nm (dark red, laser pulse duration 9 ps). The full-width at half maximum of the temporal point-spread functions is in any case <30 ps.



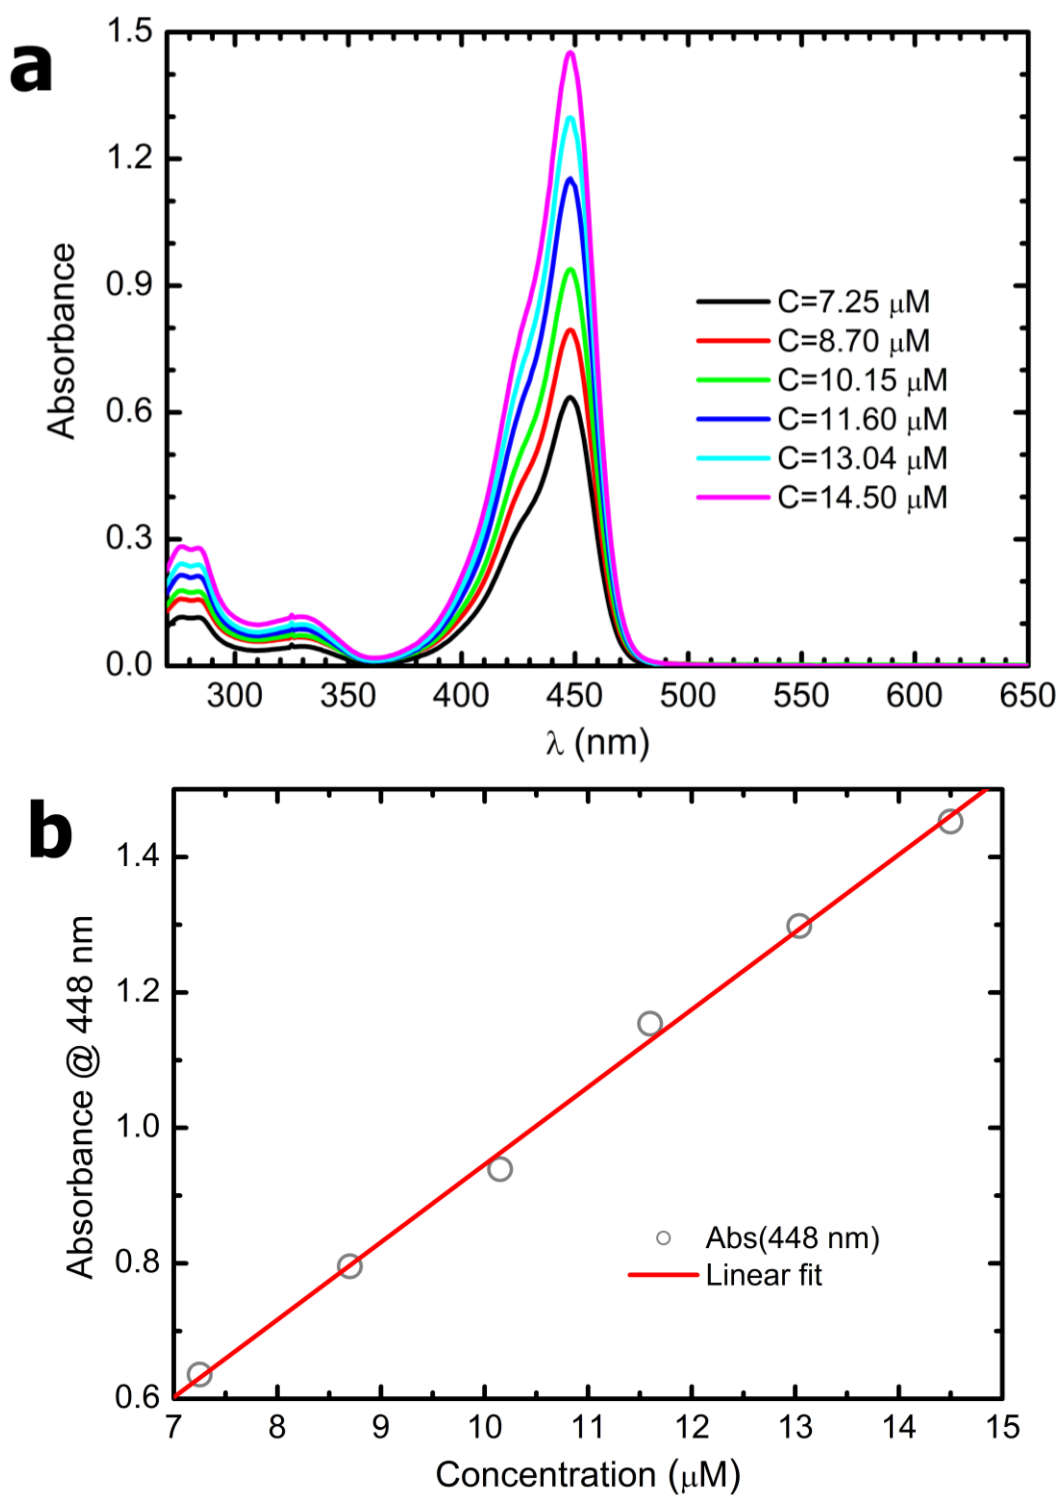

**Figure S10.** Exemplary dataset for determination of molar extinction coefficient values (namely 4a in dimethyl sulfoxide). a) Absorption spectra recorded for six solutions obtained by dilution of the stock at known concentration (determined by weight, see Materials and Methods); b) peak absorbance versus nominal concentration (dots) and linear regression of the data (red line). The slope is the molar extinction coefficient (in the case at hand  $0.1144 \mu\text{M}^{-1}\text{cm}^{-1}$ ).

## S9. Supplementary theoretical emission data

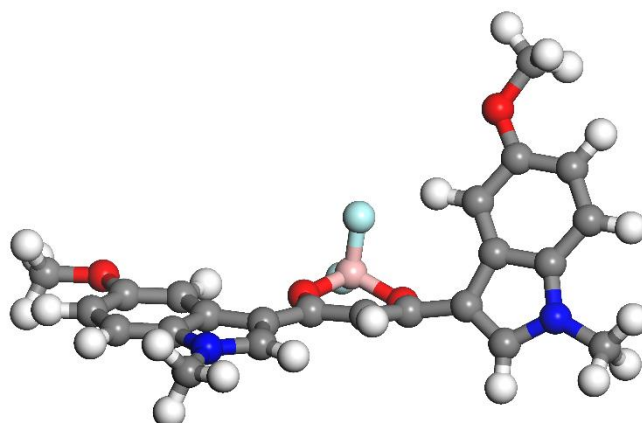

**Figure S11.** Global minimum geometry for the first excited state of **4c** as obtained at the TD- and TDA-B3LYP-D3/def2-TZVPD. Color code: red (oxygen), pink (boron), blue (nitrogen), light blue (fluoride), grey (carbon), white (hydrogen).

**Table S4.** Excited state properties of **3a** keto-enol, **3a** trans-diketo, **4a**, **4b**, and **4c** as computed at DFT/TDA-DFT with  $\omega$ B97X-D/def2-TZVPD. Vertical ( $\Delta E_{\text{vert}}$ ), adiabatic ( $\Delta E_{\text{adia}}$ ), and ZPVE-corrected adiabatic ( $\Delta E_{\text{adiaZPVE}}$ ) excitation energies for the  $S_0 \rightarrow S_1$  transition in the gas phase. The HOMO to LUMO energy difference in  $S_0$  ( $\Delta E_{\text{HOMO-LUMO}}$ ) and the vertical de-excitation energy for  $S_1 \rightarrow S_0$  transition ( $\Delta E'_{\text{vert}}$ ) is also showed for comparison. The energies are defined in Figure 8. All the energies are reported in eV. The absorption wavelength ( $\lambda_{\text{abs}\omega\text{B97}}$ , nm) corresponding to the  $S_0 \rightarrow S_1$  transition is also showed with its oscillator strength ( $f_{\text{abs}\omega\text{B97}}$ , a.u.), the dipole moment associated with the transition ( $\mu_{S_0 \rightarrow S_1}$  a.u.), and the radiative decay rates of the  $S_1$  state ( $k_{\text{rad}\omega\text{B97}}$ ,  $\text{s}^{-1}$ ), defined as in Equation 4.  $k_{\text{rad}\omega\text{B97}}$  is computed considering the intensity and the maximum of the corresponding band in the computed spectrum. The emission wavelength ( $\lambda_{\text{flu}\omega\text{B97}}$ ) corresponding to  $S_1 \rightarrow S_0$  computed on  $S_1$  geometry and its oscillator strength ( $f_{\text{flu}\omega\text{B97}}$ ) is also reported.

|                                        | <b>3a keto-enol</b> | <b>3a trans-diketo</b> <sup>1</sup> | <b>4a</b>             | <b>4b</b>             | <b>4c</b>             |
|----------------------------------------|---------------------|-------------------------------------|-----------------------|-----------------------|-----------------------|
| $\Delta E_{\text{HOMO-LUMO}}$          | 7.51                | 8.13                                | 7.15                  | 7.19                  | 7.04                  |
| $\Delta E_{\text{vert}}$               | 4.04                | 4.13                                | 3.76                  | 3.77                  | 3.69                  |
| $\Delta E_{\text{adia}}$               | 3.86                | 3.95                                | 3.65                  | 3.65                  | 3.57                  |
| $\Delta E_{\text{adiaZPVE}}$           | 3.73                | 3.84                                | 3.54                  | 3.54                  | 3.46                  |
| $\Delta E'_{\text{vert}}$              | -3.69               | -3.68                               | -3.54                 | -3.54                 | -3.46                 |
| $\mu_{S_0 \rightarrow S_1}$            | 11.4                | (0.2, 0.0, 4.1)                     | 13.6                  | 14.4                  | 15.1                  |
| $\lambda_{\text{abs}\omega\text{B97}}$ | 306.6               | 255.1 (300.26, 284.19, 258.67)      | 329.8                 | 329.0                 | 336.4                 |
| $f_{\text{abs}\omega\text{B97}}$       | 1.13                | (0.02, 0.00, 0.49)                  | 1.25                  | 1.33                  | 1.36                  |
| $k_{\text{rad}\omega\text{B97}}$       | $9.17 \times 10^9$  | $2.01 \times 10^9$                  | $1.04 \times 10^{10}$ | $1.17 \times 10^{10}$ | $1.21 \times 10^{10}$ |
| $\lambda_{\text{flu}\omega\text{B97}}$ | 335.8               | 263.6 (336.74, 298.3, 266.1)        | 350.6                 | 350.4                 | 357.8                 |
| $f_{\text{flu}\omega\text{B97}}$       | 1.10                | (0.014, 0.01, 0.49)                 | 1.26                  | 1.33                  | 1.37                  |

<sup>1</sup> The lowest energy band in the absorption, emission, and excitation spectra of **3a** trans-diketo is the result of the convolution of more than one signal. The wavelength value is the maximum of the band resulting from the convolution of these signals, while in parentheses are reported the three lowest energy transitions contributing to this band. For **3a** trans-diketo,  $k_{\text{radB3}}$  is computed for the third transition, i.e. the one having the higher oscillator strength.

**Table S5.** Excited state properties of **3a** keto-enol, **3a** trans-diketo, **4a**, **4b**, and **4c** as computed at DFT/TD-DFT with  $\omega$ B97X-D/def2-TZVPD. Vertical ( $\Delta E_{\text{vert}}$ ), adiabatic ( $\Delta E_{\text{adia}}$ ), and ZPVE-corrected adiabatic ( $\Delta E_{\text{adiaZPVE}}$ ) excitation energies for the  $S_0 \rightarrow S_1$  transition in the gas phase. The HOMO to LUMO energy difference in  $S_0$  ( $\Delta E_{\text{HOMO-LUMO}}$ ) and the vertical de-excitation energy for  $S_1 \rightarrow S_0$  transition ( $\Delta E'_{\text{vert}}$ ) is also showed for comparison. The energies are defined in Figure 8. All the energies are reported in eV. The absorption wavelength ( $\lambda_{\text{abs}\omega\text{B97}}$ , nm) corresponding to the  $S_0 \rightarrow S_1$  transition is also showed with its oscillator strength ( $f_{\text{abs}\omega\text{B97}}$ , a.u.), the dipole moment associated with the transition ( $\mu_{S_0 \rightarrow S_1}$  a.u.), and the radiative decay rates of the  $S_1$  state ( $k_{\text{rad}\omega\text{B97}}$ ,  $\text{s}^{-1}$ ), defined as in Equation 4.  $k_{\text{rad}\omega\text{B97}}$  is computed considering the intensity and the maximum of the corresponding band in the computed spectrum. The emission wavelength ( $\lambda_{\text{flu}\omega\text{B97}}$ ) corresponding to  $S_1 \rightarrow S_0$  computed on  $S_1$  geometry and its oscillator strength ( $f_{\text{flu}\omega\text{B97}}$ ) is also reported.

|                                        | <b>3a keto-enol</b> | <b>3a trans-diketo</b> <sup>1</sup>   | <b>4a</b>          | <b>4b</b>          | <b>4c</b>          |
|----------------------------------------|---------------------|---------------------------------------|--------------------|--------------------|--------------------|
| $\Delta E_{\text{HOMO-LUMO}}$          | 7.51                | 8.13                                  | 7.15               | 7.19               | 7.04               |
| $\Delta E_{\text{vert}}$               | 3.90                | 4.10                                  | 3.63               | 3.64               | 3.57               |
| $\Delta E_{\text{adia}}$               | 3.69                | 3.92                                  | 3.50               | 3.51               | 3.44               |
| $\Delta E_{\text{adiaZPVE}}$           | 3.57                | 3.81                                  | 3.40               | 3.41               | 3.33               |
| $\Delta E'_{\text{vert}}$              | -3.49               | -3.65                                 | -3.38              | -3.38              | -3.33              |
| $\mu_{S_0 \rightarrow S_1}$            | 9.5                 | (0.2, 0.0, 3.7)                       | 11.4               | 12.1               | 13.0               |
| $\lambda_{\text{abs}\omega\text{B97}}$ | 317.8               | 263.5 (302.31, 286.23, 267.52)        | 342.0              | 340.7              | 347.7              |
| $f_{\text{abs}\omega\text{B97}}$       | 0.91                | (0.02, 0.00, 0.42)                    | 1.01               | 1.08               | 1.13               |
| $k_{\text{rad}\omega\text{B97}}$       | $5.75 \times 10^9$  | $1.44 \times 10^9$                    | $6.55 \times 10^9$ | $7.51 \times 10^9$ | $8.08 \times 10^9$ |
| $\lambda_{\text{flu}\omega\text{B97}}$ | 355.2               | 272.4 (339.36, 300.46, 277.1, 274.44) | 367.2              | 366.4              | 372.9              |
| $f_{\text{flu}\omega\text{B97}}$       | 0.84                | (0.01, 0.01, 0.15, 0.34)              | 0.99               | 1.06               | 1.12               |

<sup>1</sup> The lowest energy band in the absorption, emission, and excitation spectra of **3a** trans-diketo is the result of the convolution of more than one signal. The wavelength value is the maximum of the band resulting from the convolution of these signals, while in parentheses are reported the three lowest energy transitions contributing to this band. For **3a** trans-diketo,  $k_{\text{radB3}}$  is computed for the third transition, i.e. the one having the higher oscillator strength.

**Table S6.** Excited state properties of **3a** keto-enol, **3a** trans-diketo, **4a**, **4b**, and **4c** as computed at DFT/TDA-DFT with M06-2X/def2-TZVPD. Vertical ( $\Delta E_{\text{vert}}$ ), adiabatic ( $\Delta E_{\text{adia}}$ ), and ZPVE-corrected adiabatic ( $\Delta E_{\text{adiaZPVE}}$ ) excitation energies for the  $S_0 \rightarrow S_1$  transition in the gas phase. The HOMO to LUMO energy difference in  $S_0$  ( $\Delta E_{\text{HOMO-LUMO}}$ ) and the vertical de-excitation energy for  $S_1 \rightarrow S_0$  transition ( $\Delta E'_{\text{vert}}$ ) is also showed for comparison. The energies are defined in Figure 8. All the energies are reported in eV. The absorption wavelength ( $\lambda_{\text{absM06}}$ , nm) corresponding to the  $S_0 \rightarrow S_1$  transition is also showed with its oscillator strength ( $f_{\text{absM06}}$ , a.u.), the dipole moment associated with the transition ( $\mu_{S_0 \rightarrow S_1}$  a.u.), and the radiative decay rates of the  $S_1$  state ( $k_{\text{radM06}}$ ,  $\text{s}^{-1}$ ), defined as in Equation (4).  $k_{\text{radM06}}$  is computed considering the intensity and the maximum of the corresponding band in the computed spectrum. The emission wavelength ( $\lambda_{\text{fluM06}}$ ) corresponding to  $S_1 \rightarrow S_0$  computed on  $S_1$  geometry, and its oscillator strength ( $f_{\text{fluM06}}$ ) is also reported.

|                               | <b>3a keto-enol</b> | <b>3a trans-diketo</b> <sup>1</sup>    | <b>4a</b>             | <b>4b</b>             | <b>4c</b>             |
|-------------------------------|---------------------|----------------------------------------|-----------------------|-----------------------|-----------------------|
| $\Delta E_{\text{HOMO-LUMO}}$ | 5.95                | 6.57                                   | 5.60                  | 5.64                  | 5.51                  |
| $\Delta E_{\text{vert}}$      | 3.96                | 4.05                                   | 3.68                  | 3.57                  | 3.60                  |
| $\Delta E_{\text{adia}}$      | 3.80                | 3.90                                   | 3.57                  | 3.68                  | 3.49                  |
| $\Delta E_{\text{adiaZPVE}}$  | 3.66                | 3.77                                   | 3.46                  | 3.46                  | 3.37                  |
| $\Delta E'_{\text{vert}}$     | -3.64               | -3.69                                  | -3.47                 | -3.58                 | -3.38                 |
| $\mu_{S_0 \rightarrow S_1}$   | 12.0                | (0.2, 0.0, 4.2)                        | 14.3                  | 15.2                  | 15.7                  |
| $\lambda_{\text{absM06}}$     | 312.9               | 260.0 (306.45, 292.82, 262.90)         | 337.3                 | 336.6                 | 344.8                 |
| $f_{\text{absM06}}$           | 1.17                | (0.02, 0.00, 0.48)                     | 1.29                  | 1.37                  | 1.38                  |
| $k_{\text{radM06}}$           | $9.54 \times 10^9$  | $1.95 \times 10^9$                     | $1.08 \times 10^{10}$ | $1.11 \times 10^{10}$ | $1.21 \times 10^{10}$ |
| $\lambda_{\text{fluM06}}$     | 340.2               | 268.4 (336.35, 302.58, 270.81, 268.45) | 357.7                 | 357.8                 | 366.5                 |
| $f_{\text{fluM06}}$           | 1.15                | (0.011, 0.009, 0.376, 0.1749)          | 1.31                  | 1.39                  | 1.41                  |

<sup>1</sup> The lowest energy band in the absorption, emission, and excitation spectra of **3a** *trans*-diketo is the result of the convolution of more than one signal. The wavelength value is the maximum of the band resulting from the convolution of these signals, while in parentheses are reported the three lowest energy transitions contributing to this band. For **3a** *trans*-diketo,  $k_{\text{radB3}}$  is computed for the third transition, i.e. the one having the higher oscillator strength.

**Table S7.** Excited state properties of **3a** keto-enol, **3a** *trans*-diketo, **4a**, **4b**, and **4c** as computed at DFT/TDA-DFT with CAM-B3LYP-D3/def2-TZVPD. Vertical ( $\Delta E_{\text{vert}}$ ), adiabatic ( $\Delta E_{\text{adia}}$ ), and ZPVE-corrected adiabatic ( $\Delta E_{\text{adiaZPVE}}$ ) excitation energies for the  $S_0 \rightarrow S_1$  transition in the gas phase. The HOMO to LUMO energy difference in  $S_0$  ( $\Delta E_{\text{HOMO-LUMO}}$ ) and the vertical de-excitation energy for  $S_1 \rightarrow S_0$  transition ( $\Delta E'_{\text{vert}}$ ) is also showed for comparison. The energies are defined in Figure 8. All the energies are reported in eV. The absorption wavelength ( $\lambda_{\text{absCAM}}$ , nm) corresponding to the  $S_0 \rightarrow S_1$  transition is also showed with its oscillator strength ( $f_{\text{absCAM}}$ , a.u.), the dipole moment associated with the transition ( $\mu_{S_0 \rightarrow S_1}$  a.u.), and the radiative decay rates of the  $S_1$  state ( $k_{\text{radCAM}}$ , s<sup>-1</sup>), defined as in Equation (4).  $k_{\text{radCAM}}$  is computed considering the intensity and the maximum of the corresponding band in the computed spectrum. The emission wavelength ( $\lambda_{\text{fluoCAM}}$ ) corresponding to  $S_1 \rightarrow S_0$  computed on  $S_1$  geometry, and its oscillator strength ( $f_{\text{fluoCAM}}$ ) is also reported.

|                               | <b>3a keto-enol</b> | <b>3a trans-diketo</b> <sup>1</sup>   | <b>4a</b>             | <b>4b</b>             | <b>4c</b>             |
|-------------------------------|---------------------|---------------------------------------|-----------------------|-----------------------|-----------------------|
| $\Delta E_{\text{HOMO-LUMO}}$ | 6.32                | 6.94                                  | 5.99                  | 6.03                  | 5.89                  |
| $\Delta E_{\text{vert}}$      | 3.96                | 4.13                                  | 3.71                  | 3.72                  | 3.63                  |
| $\Delta E_{\text{adia}}$      | 3.81                | 3.96                                  | 3.60                  | 3.61                  | 3.52                  |
| $\Delta E_{\text{adiaZPVE}}$  | 3.68                | 3.82                                  | 3.49                  | 3.50                  | 3.41                  |
| $\Delta E'_{\text{vert}}$     | -3.66               | -3.69                                 | -3.50                 | -3.50                 | -3.42                 |
| $\mu_{S_0 \rightarrow S_1}$   | 11.7                | (0.2, 0.0, 4.0)                       | 13.8                  | 14.6                  | 15.2                  |
| $\lambda_{\text{absCAM}}$     | 312.8               | 259.3 (299.85, 283.93, 262.58)        | 334.5                 | 333.7                 | 341.9                 |
| $f_{\text{absCAM}}$           | 1.13                | (0.02, 0.00, 0.47)                    | 1.25                  | 1.33                  | 1.35                  |
| $k_{\text{radCAM}}$           | $9.00 \times 10^9$  | $1.66 \times 10^9$                    | $1.03 \times 10^{10}$ | $1.16 \times 10^{10}$ | $1.17 \times 10^{10}$ |
| $\lambda_{\text{fluoCAM}}$    | 339.2               | 269.2 (335.65, 297.65, 272.1, 270.22) | 354.5                 | 354.3                 | 363.0                 |
| $f_{\text{fluoCAM}}$          | 1.10                | (0.01, 0.01, 0.28, 0.25)              | 1.26                  | 1.34                  | 1.37                  |

<sup>1</sup> The lowest energy band in the absorption, emission, and excitation spectra of **3a** *trans*-diketo is the result of the convolution of more than one signal. The wavelength value is the maximum of the band resulting from the convolution of these signals, while in parentheses are reported the three lowest energy transitions contributing to this band. For **3a** *trans*-diketo,  $k_{\text{radB3}}$  is computed for the third transition, i.e. the one having the higher oscillator strength.

**Table S8.** Excited state properties of **3a** keto-enol, **3a** trans-diketo, **4a**, **4b**, and **4c** as computed at DFT/TDA-DFT with B3LYP-D3/def2-TZVPD. Vertical ( $\Delta E_{\text{vert}}$ ), adiabatic ( $\Delta E_{\text{adia}}$ ), and ZPVE-corrected adiabatic ( $\Delta E_{\text{adiaZPVE}}$ ) excitation energies for the  $S_0 \rightarrow S_1$  transition in the gas phase. The HOMO to LUMO energy difference in  $S_0$  ( $\Delta E_{\text{HOMO-LUMO}}$ ) and the vertical de-excitation energy for  $S_1 \rightarrow S_0$  transition ( $\Delta E'_{\text{vert}}$ ) is also showed for comparison. The energies are defined in Figure 8. All the energies are reported in eV. The absorption wavelength ( $\lambda_{\text{absB97}}$ , nm) corresponding to the  $S_0 \rightarrow S_1$  transition is also showed with its oscillator strength ( $f_{\text{absB97}}$ , a.u.), the dipole moment associated with the transition ( $\mu_{S_0 \rightarrow S_1}$  a.u.), and the radiative decay rates of the  $S_1$  state ( $k_{\text{radB97}}$ ,  $\text{s}^{-1}$ ), defined as in Equation 4.  $k_{\text{radB97}}$  is computed considering the intensity and the maximum of the corresponding band in the computed spectrum. The emission wavelength ( $\lambda_{\text{fluoB3TDA}}$ ) corresponding to  $S_1 \rightarrow S_0$  computed on  $S_1$  geometry, and its oscillator strength ( $f_{\text{fluoB3TDA}}$ ) is also reported. The  $S_1$  used in the energy and emission spectra calculations have been the CAM-B3LYP-D3 geometries.

|                               | <b>3a keto-enol</b> | <b>3a trans-diketo</b> <sup>1</sup> | <b>4a</b>          | <b>4b</b>          | <b>4c</b> <sup>2</sup> |
|-------------------------------|---------------------|-------------------------------------|--------------------|--------------------|------------------------|
| $\Delta E_{\text{HOMO-LUMO}}$ | 3.84                | 4.41                                | 3.58               | 3.61               | 3.49                   |
| $\Delta E_{\text{vert}}$      | 3.55                | 3.77                                | 3.34               | 3.32               | 3.14                   |
| $\Delta E_{\text{adia}}$      | 3.49                | 3.59                                | 3.31               | 3.30               | 3.10                   |
| $\Delta E_{\text{adiaZPVE}}$  | 3.48                | 3.57                                | 3.33               | 3.30               | 3.13                   |
| $\Delta E'_{\text{vert}}$     | -3.37               | -3.34                               | -3.24              | -3.21              | -3.03                  |
| $\mu_{S_0 \rightarrow S_1}$   | 11.4                | (0.92, 1.45, 0.19)                  | 14.0               | 14.4               | 12.7                   |
| $\lambda_{\text{absB3TDA}}$   | 349.3               | 308.8 (329.21, 310.52, 310.49)      | 371.6              | 373.1              | 394.5                  |
| $f_{\text{absB3TDA}}$         | 0.99                | (0.09, 0.14, 0.02)                  | 1.14               | 1.17               | 0.98                   |
| $k_{\text{radB3TDA}}$         | $6.18 \times 10^9$  | $4.82 \times 10^7$                  | $7.69 \times 10^9$ | $8.05 \times 10^9$ | $5.30 \times 10^9$     |
| $\lambda_{\text{fluoB3TDA}}$  | 368.1               | 314 (371.08, 328.8, 320.12)         | 383.1              | 385.7              | 409.8                  |
| $f_{\text{fluoB3TDA}}$        | 0.97                | (0.03, 0.11, 0.03)                  | 1.19               | 1.23               | 1.03                   |

<sup>1</sup> The lowest energy band in the absorption, emission, and excitation spectra of **3a trans-diketo** is the result of the convolution of more than one signal. The wavelength value is the maximum of the band resulting from the convolution of these signals, while in parentheses are reported the three lowest energy transitions contributing to this band.

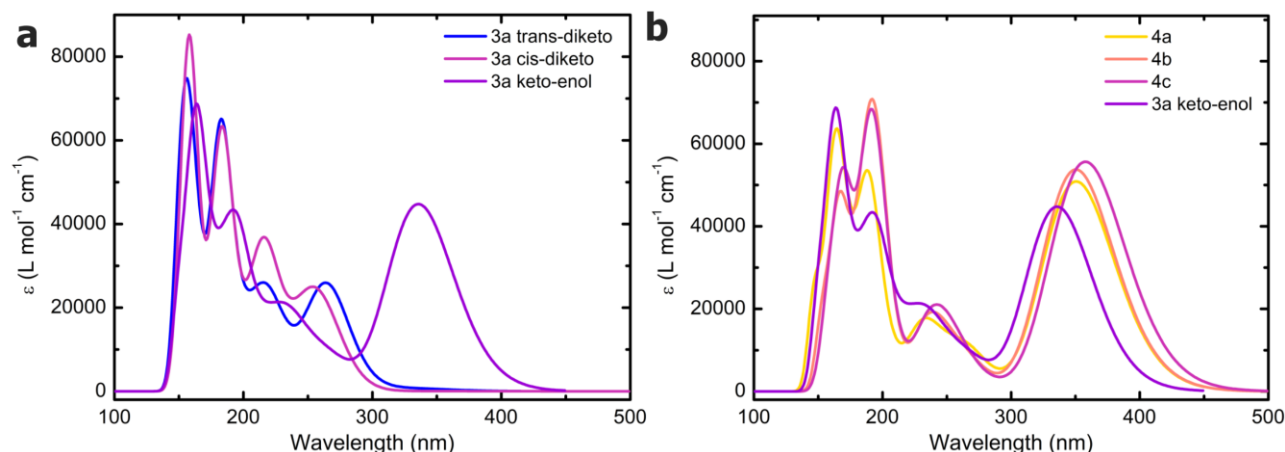

**Figure S12.** Electronic fluorescence spectra of (a) the three conformers of **3a** and (b) the BF<sub>2</sub>bdks compounds as computed at the TDA- $\omega$ B97X-D/def2-TZVPD for  $S_1$  including the first 100 excitations.

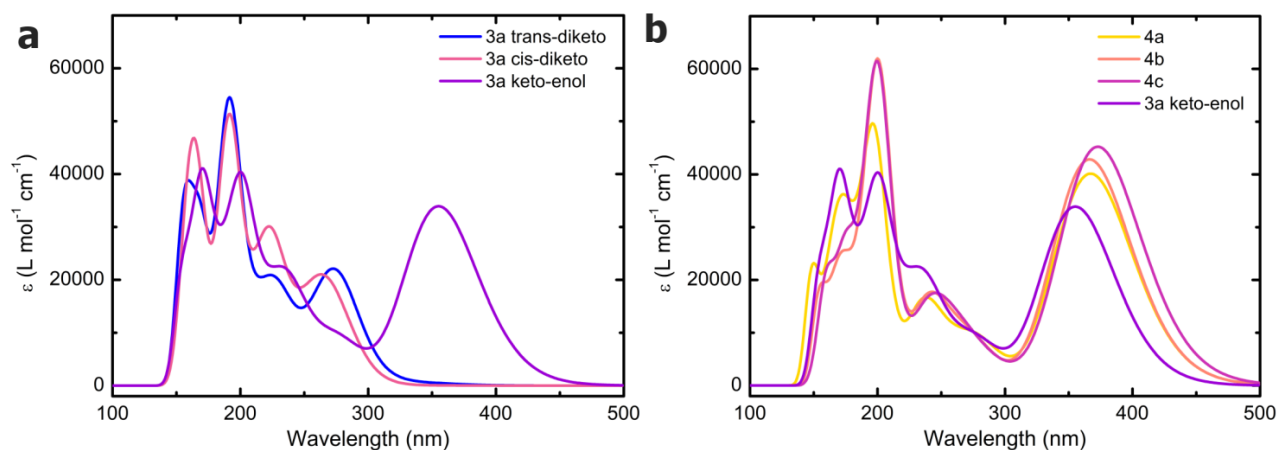

**Figure S13.** Electronic fluorescence spectra of (a) the three conformers of **3a** and (b) the BF<sub>2</sub>bdks compounds as computed at the TD- $\omega$ B97X-D/def2-TZVPD for  $S_1$  including the first 100 excitations.

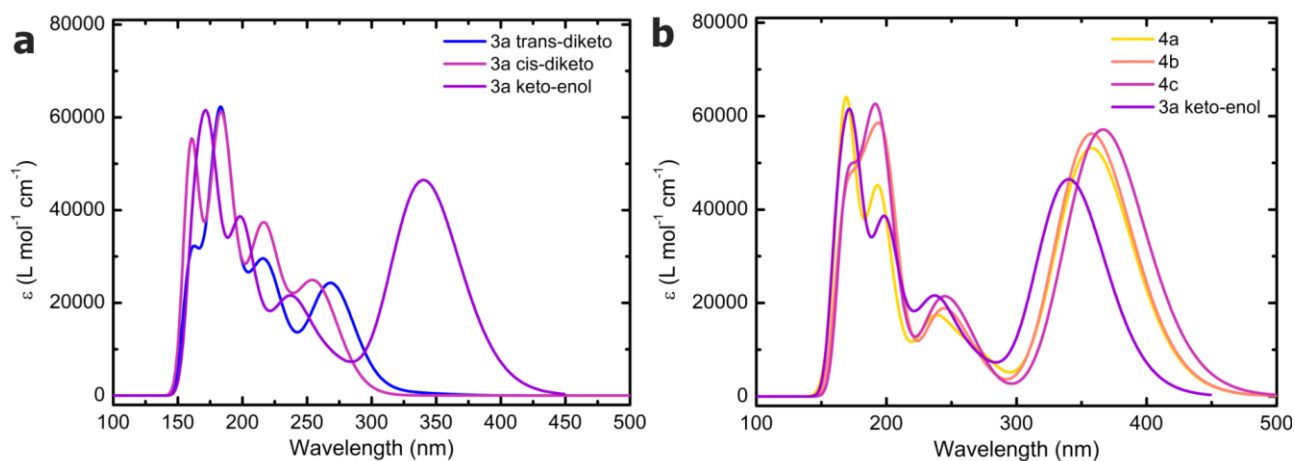

**Figure S14.** Electronic fluorescence spectra of (a) the three conformers of **3a** and (b) the BF<sub>2</sub>bdks compounds as computed at the TDA-M06-2X/def2-TZVPD for  $S_1$  including the first 100 excitations.

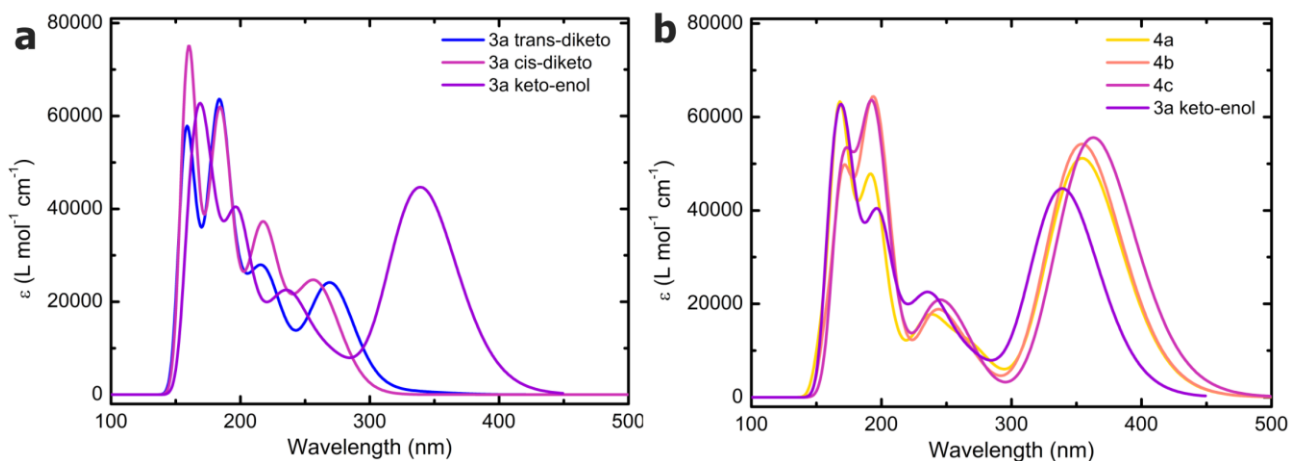

**Figure S15.** Electronic fluorescence spectra of (a) the three conformers of **3a** and (b) the BF<sub>2</sub>bdks compounds as computed at the TDA-CAM-B3LYP-D3/def2-TZVPD for  $S_1$  including the first 100 excitations.

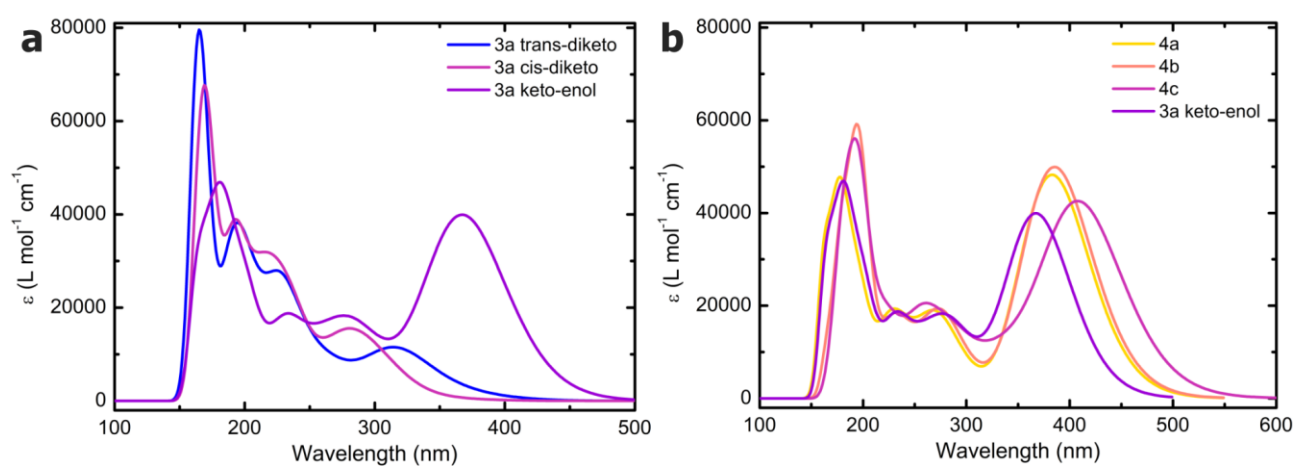

**Figure S16.** Electronic fluorescence spectra of (a) the three conformers of **3a** and (b) the BF<sub>2</sub>bdks compounds as computed at the TDA-B3LYP-D3/def2-TZVPD for  $S_1$  including the first 100 excitations. The spectra are obtained on the TDA-CAM-B3LYP-D3 geometry for  $S_1$ .
